# Supplementary material for: Fast and Sensitive Quantification of AccQ-Tag Derivatized Amino Acids and Biogenic Amines by UHPLC-UV Analysis from Complex Biological Samples
Source: MDPI journal article supplement (doi:10.3390/metabo12030272), 2022-03-21
Supplement: s1 [file s1]

Figure S1: Examination of sample loss after purification. The y axis show the mean peak area of the corresponding amino acid determined from two technical replicates.
