# Supplementary material for: Fast and Sensitive Quantification of AccQ-Tag Derivatized Amino Acids and Biogenic Amines by UHPLC-UV Analysis from Complex Biological Samples
Source: MDPI journal article supplement (doi:10.3390/metabo12030272), 2022-03-21
Supplement: s1 [file s1]

**Table S1:** Calibration parameters of the analyzed molecules in different matrices obtained with LC analysis. tr: retention time, MQ: MilliQ water, LOD: limit of detection, LOQ: limit of quantification, R<sup>2</sup>: goodness of fit.

| Compound                       | Abbrev.   | tr (min) |       |       | LOD (μmol/L) |       |       | LOQ (μmol/L) |       |       | Linear range (μmol/L) |            |            | R <sup>2</sup> |        |        | Calibration equation |                  |                  |
|--------------------------------|-----------|----------|-------|-------|--------------|-------|-------|--------------|-------|-------|-----------------------|------------|------------|----------------|--------|--------|----------------------|------------------|------------------|
|                                |           | MQ       | Serum | Tears | MQ           | Serum | Tears | MQ           | Serum | Tears | MQ                    | Serum      | Tears      | MQ             | Serum  | Tears  | MQ                   | Serum            | Tears            |
| Histidine                      | His       | 1.445    | 1.445 | 1.447 | 1.81         | 2.30  | 0.73  | 6.04         | 7.68  | 2.42  | 1.00-25.00            | 2.50-30.00 | 1.00-25.00 | 0.9960         | 0.9929 | 0.9962 | y=3860.5x-2913       | y=3892.1x-5107.1 | y=3669.8x-2107.1 |
| Asparagine                     | Asn       | 1.678    | 1.677 | 1.679 | 0.38         | 0.34  | 0.59  | 1.27         | 1.12  | 1.98  | 0.50-25.00            | 0.50-30.00 | 0.50-20.00 | 0.9946         | 0.9979 | 0.9981 | y=3828.2x-190.91     | y=3748x-663.53   | y=3720.2x-818.48 |
| Taurine                        | Tau       | 1.916    | 1.917 | 1.915 | 0.20         | 0.20  | 0.22  | 0.68         | 0.66  | 0.73  | 0.25-25.00            | 2.50-30.00 | 0.50-25.00 | 0.9987         | 0.9996 | 0.9977 | y=4890x-523.91       | y=4729.1x-2402.4 | y=4420.8x+312.95 |
| Serine                         | Ser       | 2.370    | 2.367 | 2.372 | 0.21         | 0.22  | 0.18  | 0.69         | 0.74  | 0.59  | 0.25-25.00            | 2.50-25.00 | 0.50-25.00 | 0.9963         | 0.9983 | 0.9938 | y=4479.2x-66.304     | y=4448.8x-1539.6 | y=4009.3x+1387.1 |
| Glutamine                      | Gln       | 2.547    | 2.546 | 2.550 | 2.02         | 1.91  | 1.67  | 6.74         | 6.37  | 5.58  | 0.50-25.00            | 0.50-30.00 | 1.00-25.00 | 0.9937         | 0.9973 | 0.9954 | y=1417.1x-106.37     | y=1286x+1204.9   | y=1389.2x+476.11 |
| Arginine                       | Arg       | 2.643    | 2.643 | 2.650 | 1.37         | 0.10  | 0.78  | 4.57         | 0.33  | 2.60  | 0.50-20.00            | 0.50-25.00 | 1.00-25.00 | 0.9971         | 0.9909 | 0.9889 | y=1608.9x-750.81     | y=1412.1x-372.8  | y=1731x-193.31   |
| Histamine                      | Hsn       | 2.748    | 2.744 | 2.754 | 0.72         | 0.75  | 0.52  | 2.39         | 2.51  | 1.73  | 0.50-25.00            | 2.50-25.00 | 0.50-25.00 | 0.9964         | 0.9974 | 0.9950 | y=2629.8x-81.772     | y=2668.8x-2084.9 | y=2577.5x-546.46 |
| Glycine                        | Gly       | 2.911    | 2.906 | 2.913 | 0.41         | 0.38  | 0.74  | 1.36         | 1.26  | 2.45  | 0.50-25.00            | 2.50-30.00 | 1.00-25.00 | 0.9961         | 0.9992 | 0.9932 | y=4152.6x+635.83     | y=4139.6x-1428.2 | y=3710.6x+566.8  |
| Ethanolamine                   | Eth       | 3.208    | 3.205 | 3.212 | 0.25         | 0.22  | 0.28  | 0.84         | 0.74  | 0.93  | 0.50-25.00            | 2.50-30.00 | 0.25-15.00 | 0.9952         | 0.9989 | 0.9995 | y=4658.6x-173.92     | y=4606.2x-2136.7 | y=4269.7x+269.24 |
| Aspartate                      | Asp       | 3.482    | 3.475 | 3.481 | 0.25         | 0.22  | 0.20  | 0.84         | 0.74  | 0.68  | 0.50-25.00            | 0.50-30.00 | 0.50-20.00 | 0.9870         | 0.9964 | 0.9976 | y=4180.9x+305.26     | y=4188.1x-278.46 | y=4263.2-1075.9  |
| Methylamine                    | Mea       | 3.876    | 3.870 | 3.879 | 0.26         | 0.31  | 0.20  | 0.85         | 1.02  | 0.68  | 0.25-25.00            | 0.50-30.00 | 0.25-15.00 | 0.9885         | 0.9965 | 0.9991 | y=4057.6x-149.51     | y=4080x-1009.4   | y=3915x-408.56   |
| Glutamate                      | Glu       | 4.845    | 4.840 | 4.841 | 0.44         | 0.49  | 0.36  | 1.48         | 1.64  | 1.20  | 0.25-25.00            | 0.50-30.00 | 0.25-15.00 | 0.9900         | 0.9971 | 0.9985 | y=3650.5x+159.46     | y=3830.6x-290.2  | y=3578.2x+69.564 |
| Citrulline                     | Cit       | 4.940    | 4.938 | 4.938 | 0.37         | 0.44  | 0.28  | 1.24         | 1.46  | 0.92  | 0.25-25.00            | 2.50-30.00 | 0.25-15.00 | 0.9962         | 0.9989 | 0.9997 | y=4024.1x+36.865     | y=4088.8x-1881.8 | y=3734.5x+223.58 |
| Threonine                      | Thr       | 5.493    | 5.500 | 5.514 | 0.18         | 0.17  | 0.20  | 0.61         | 0.56  | 0.66  | 0.25-25.00            | 2.50-30.00 | 1.00-25.00 | 0.9962         | 0.9991 | 0.9923 | y=4577x-189.99       | y=4518.4x-1481.8 | y=4097.2x+1032.5 |
| Alanine                        | Ala       | 5.946    | 5.956 | 5.977 | 0.22         | 0.23  | 0.12  | 0.74         | 0.78  | 0.41  | 0.25-25.00            | 1.00-30.00 | 0.25-15.00 | 0.9910         | 0.9973 | 0.9989 | y=4485.8x-301.83     | y=4444.7x+401.51 | y=4229.7x+46.267 |
| Ethylamine                     | Eta       | 6.146    | 6.157 | 6.181 | 0.18         | 0.13  | 0.15  | 0.61         | 0.44  | 0.50  | 0.50-25.00            | 0.25-30.00 | 0.25-15.00 | 0.9809         | 0.9948 | 0.9982 | y=4651.6x+1115.2     | y=4698.4x-191.1  | y=4616.2x-299.08 |
| Proline                        | Pro       | 6.356    | 6.378 | 6.417 | 0.13         | 0.16  | 0.26  | 0.44         | 0.53  | 0.88  | 0.25-25.00            | 2.50-30.00 | 1.00-25.00 | 0.9948         | 0.9987 | 0.9916 | y=4175.9x-37.55      | y=4144.9x-1235.4 | y=3756.1x+882.19 |
| Ornithine                      | Orn       | 6.914    | 6.970 | 7.061 | 0.15         | 0.17  | 0.16  | 0.50         | 0.56  | 0.55  | 0.25-25.00            | 2.50-30.00 | 0.25-15.00 | 0.9892         | 0.9964 | 0.9987 | y=7707.5x-40.697     | y=7813.7x-2198.1 | y=7290.7x+363.3  |
| Cysteine                       | Cys       | 7.336    | 7.397 | 7.492 | 0.17         | 0.14  | 0.20  | 0.56         | 0.47  | 0.67  | 0.50-25.00            | 2.50-30.00 | 1.00-25.00 | 0.9982         | 0.9995 | 0.9974 | y=3983x-579.2        | y=3855x-1903.3   | y=3483.4x+443.04 |
| Lysine                         | Lys       | 7.521    | 7.578 | 7.668 | 0.23         | 0.26  | 0.52  | 0.75         | 0.85  | 1.74  | 0.25-25.00            | 2.50-30.00 | 0.25-15.00 | 0.9859         | 0.9945 | 0.9983 | y=6416.8x+263.85     | y=6297.1x-552.86 | y=5433.3x-148.64 |
| Tyrosine                       | Tyr       | 7.596    | 7.643 | 7.724 | 0.17         | 0.24  | 0.78  | 0.56         | 0.81  | 2.60  | 0.50-25.00            | 2.50-30.00 | 0.50-25.00 | 0.9990         | 0.9996 | 0.9991 | y=4213.5x-194.44     | y=3992.8x-2012.4 | y=3402.4x+2.7552 |
| Putrescine                     | Put       | 7.665    | 7.719 | 7.796 | 0.14         | 0.26  | 0.13  | 0.47         | 0.87  | 0.44  | 0.25-25.00            | 2.50-30.00 | 0.25-15.00 | 0.9891         | 0.9966 | 0.9987 | y=7099.6x-194.6      | y=7616.2x-3549.9 | y=7072.7x-42.892 |
| Methionine                     | Met       | 7.865    | 7.887 | 7.922 | 0.13         | 0.13  | 0.38  | 0.44         | 0.43  | 1.28  | 0.50-25.00            | 2.50-30.00 | 1.00-25.00 | 0.9970         | 0.9994 | 0.9949 | y=4363.9x-142.2      | y=4184x-1767.6   | y=3639.9x+879.88 |
| Serotonin                      | Stn       | 7.920    | 7.935 | 7.962 | 0.81         | 0.12  | 0.38  | 2.71         | 0.41  | 1.28  | 0.50-30.00            | 2.50-25.00 | 0.25-30.00 | 0.9980         | 0.9978 | 0.9981 | y=3858.1x-1256.7     | y=3782.5x-4345.7 | y=3295.7x-47.009 |
| Valine                         | Val       | 7.991    | 8.001 | 8.019 | 0.11         | 0.39  | 0.21  | 0.38         | 1.30  | 0.69  | 0.25-25.00            | 2.50-30.00 | 0.25-20.00 | 0.9943         | 0.9985 | 0.9982 | y=3972.4x+114.77     | y=3670.1x-486.45 | y=2371.7x+142.08 |
| Cadaverine                     | Cad       | 8.029    | 8.033 | 8.044 | 0.21         | 0.14  | 0.33  | 0.69         | 0.47  | 1.10  | 0.25-25.00            | 2.50-30.00 | 0.25-15.00 | 0.9858         | 0.9947 | 0.9977 | y=6926.8x+255.02     | y=7099x-2537.3   | y=5684.9x-79.418 |
| Tyramine                       | Tra       | 8.069    | 8.075 | 8.090 | 0.30         | 0.30  | 0.20  | 0.99         | 0.99  | 0.65  | 0.25-25.00            | 2.50-30.00 | 0.25-20.00 | 0.9983         | 0.9996 | 0.9992 | y=4229.9x+82.921     | y=4164.2x-1991   | y=4183.3x-270.81 |
| Isoleucine                     | Ile       | 8.446    | 8.453 | 8.468 | 0.13         | 0.17  | 0.18  | 0.43         | 0.55  | 0.61  | 0.25-25.00            | 2.50-30.00 | 0.50-20.00 | 0.9949         | 0.9986 | 0.9979 | y=4553x-38.987       | y=4547.8x-1589.8 | y=4396.9x-967.46 |
| Leucine                        | Leu       | 8.535    | 8.544 | 8.562 | 0.11         | 0.11  | 0.25  | 0.36         | 0.38  | 0.82  | 0.25-20.00            | 0.50-25.00 | 0.25-20.00 | 0.9982         | 0.9974 | 0.9988 | y=5886.6x-913.74     | y=5546x+747.22   | y=5280.4x+157.72 |
| Phenylalanine                  | Phe       | 8.662    | 8.673 | 8.696 | 0.17         | 0.16  | 0.21  | 0.55         | 0.53  | 0.70  | 0.25-25.00            | 2.50-30.00 | 0.50-25.00 | 0.9987         | 0.9996 | 0.9982 | y=4783.6x-200.49     | y=4600.5x-2403.9 | y=4259x+40.601   |
| Tryptophan                     | Trp       | 8.785    | 8.794 | 8.807 | 0.61         | 0.22  | 0.20  | 2.02         | 0.72  | 0.66  | 1.00-25.00            | 2.50-30.00 | 0.25-25.00 | 0.9992         | 0.9995 | 0.9993 | y=3638.1x-1608.8     | y=3438.7x-3021.5 | y=3197.3x-322.9  |
| Tryptamine + 2-phenethyl-amine | Tpa + Pha | 8.932    | 8.931 | 8.933 | 0.14         | 0.18  | 0.27  | 0.47         | 0.58  | 0.89  | 0.25-25.00            | 2.50-30.00 | 0.25-25.00 | 0.9975         | 0.9995 | 0.9966 | y=10129x-1079.1      | y=9741.7x-5269.3 | y=8947.3x+2112.5 |

**Table S2:** Calibration parameters of the analyzed molecules in different matrices obtained by SRM. tr: retention time, MQ: MilliQ water, LOD: limit of detection, LOQ: limit of quantification, R<sup>2</sup>: goodness of fit.

| Compound               | Abbrev.          | LOD (μmol/L) |       |       | LOQ (μmol/L) |       |       | Linear range (μmol/L) |            |            | R <sup>2</sup> |        |        | Calibration equation |                    |                     |
|------------------------|------------------|--------------|-------|-------|--------------|-------|-------|-----------------------|------------|------------|----------------|--------|--------|----------------------|--------------------|---------------------|
|                        |                  | MQ           | Serum | Tears | MQ           | Serum | Tears | MQ                    | Serum      | Tears      | MQ             | Serum  | Tears  | MQ                   | Serum              | Tears               |
| Histidine              | His              | 0.62         | 0.38  | 0.05  | 2.05         | 1.28  | 0.18  | 0.25-5.00             | 0.25-15.00 | 0.25-30.00 | 0.9501         | 0.9571 | 0.9901 | y=12312x+188.41      | y=6690.8x+299.92   | y=5816x+583         |
| Asparagine             | Asn              | 0.10         | 0.07  | 0.09  | 0.35         | 0.22  | 0.31  | 0.25-25.00            | 0.25-30.00 | 0.25-30.00 | 0.9922         | 0.9971 | 0.9812 | y=371420x+303930     | y=333720x+42504    | y=301810x+59681     |
| Taurine                | Tau              | 0.11         | 0.08  | 0.13  | 0.35         | 0.26  | 0.45  | 0.25-15.00            | 0.25-15.00 | 0.25-10.00 | 0.9844         | 0.9939 | 0.991  | y=124750x+184720     | y=1091100x+222630  | y=1132800x+131900   |
| Serine                 | Ser              | 0.34         | 0.12  | 0.16  | 1.13         | 0.41  | 0.54  | 0.25-20.00            | 0.25-15.00 | 0.25-20.00 | 0.9728         | 0.9939 | 0.9914 | y=230160x+43664      | y=188530x+35518    | y=173870x+41266     |
| Glutamine              | Gln              | 0.27         | 0.11  | 0.10  | 0.89         | 0.38  | 0.35  | 0.25-20.00            | 0.25-30.00 | 0.25-20.00 | 0.9811         | 0.9933 | 0.9945 | y=116290x+9123.6     | y=92320x+76101     | y=89145x+6316.2     |
| Arginine               | Arg              | 0.06         | 0.05  | 0.04  | 0.20         | 0.17  | 0.13  | 0.25-25.00            | 0.25-30.00 | 0.25-25.00 | 0.9969         | 0.9964 | 0.9958 | y=75362x+1810.2      | y=69439x+2550.3    | y=64679x+4159.5     |
| Histamine              | Hsn              | 0.20         | 0.11  | 0.07  | 0.65         | 0.36  | 0.25  | 0.25-15.00            | 0.25-10.00 | 0.25-10.00 | 0.9718         | 0.9954 | 0.99   | y=1628100x+32780     | y=1475700x+176490  | y=1527800x+228440   |
| Glycine                | Gly              | 0.40         | 0.14  | 0.10  | 1.33         | 0.47  | 0.35  | 0.25-15.00            | 0.25-15.00 | 0.25-20.00 | 0.969          | 0.9937 | 0.9928 | y=87225x+43383       | y=71687x+23415     | y=66764x+22287      |
| Ethanolamine           | Eth              | 0.06         | 0.10  | 0.07  | 0.20         | 0.33  | 0.24  | 0.25-2.50             | 0.25-5.00  | 0.25-2.50  | 0.9946         | 0.9861 | 0.9891 | y=7892700x+578120    | y=5700900x+1002000 | y=6852100x+596130   |
| Aspartate              | Asp              | 0.06         | 0.11  | 0.13  | 0.19         | 0.36  | 0.44  | 0.25-20.00            | 0.25-30.00 | 0.25-20.00 | 0.9957         | 0.9957 | 0.9945 | y=243470x+15357      | y=213400x+10136    | y=209250x+14457     |
| Methylamine            | Mea              | 0.09         | 0.07  | 0.04  | 0.31         | 0.22  | 0.13  | 0.25-2.50             | 0.25-2.50  | 0.25-2.50  | 0.9899         | 0.9794 | 0.9879 | y=10998000x+854830   | Y=9605800X+780600  | y=9828200x+1005600  |
| Glutamate              | Glu              | 0.18         | 0.16  | 0.05  | 0.59         | 0.52  | 0.16  | 0.25-20.00            | 0.25-30.00 | 0.25-20.00 | 0.9914         | 0.9955 | 0.9961 | y=200980x+20420      | y=172740x+15552    | y=167000x+19499     |
| Citrulline             | Cit              | 0.11         | 0.05  | 0.13  | 0.36         | 0.18  | 0.43  | 0.25-20.00            | 0.25-30.00 | 0.25-20.00 | 0.9903         | 0.9895 | 0.9924 | y=787570x+115960     | y=651310x+115560   | y=665430x+99481     |
| Threonine              | Thr              | 0.11         | 0.05  | 0.09  | 0.35         | 0.18  | 0.31  | 0.25-25.00            | 0.25-30.00 | 0.25-20.00 | 0.9911         | 0.999  | 0.9969 | y=130650x+11749      | y=114800x+15572    | y=110240x+10328     |
| Alanine                | Ala              | 0.18         | 0.09  | 0.11  | 0.59         | 0.29  | 0.37  | 0.25-20.00            | 0.25-30.00 | 0.25-20.00 | 0.9931         | 0.9931 | 0.9963 | y=321060x+38689      | y=276410x+111620   | y=282980x+38419     |
| Ethylamine             | Eta              | 0.20         | 0.20  | 0.15  | 0.66         | 0.67  | 0.48  | 0.25-1.00             | 0.25-1.00  | 0.25-1.00  | 0.9967         | 0.9876 | 0.996  | y=3884500x+13176     | y=12643000x+526520 | y=11584000x+1455100 |
| Proline                | Pro              | 0.12         | 0.06  | 0.07  | 0.39         | 0.20  | 0.22  | 0.25-15.00            | 0.25-15.00 | 0.25-15.00 | 0.9897         | 0.9955 | 0.9729 | y=910020x+106240     | y=819010x+132710   | y=788890x+140950    |
| Ornithine              | Orn              | 0.12         | 0.08  | 0.07  | 0.38         | 0.26  | 0.22  | 0.25-20.00            | 0.25-30.00 | 0.25-20.00 | 0.9943         | 0.9953 | 0.9981 | y=336010x+41211      | y=285230x+35028    | y=287020x+39900     |
| Cysteine               | Cys              | 0.07         | 0.04  | 0.04  | 0.23         | 0.15  | 0.13  | 0.25-25.00            | 0.25-30.00 | 0.25-20.00 | 0.9953         | 0.9973 | 0.9977 | y=245860x+19091      | y=211030x+26068    | y=214730x+14727     |
| Lysine                 | Lys              | 0.07         | 0.08  | 0.07  | 0.32         | 0.27  | 0.25  | 0.25-25.00            | 0.25-30.00 | 0.25-20.00 | 0.9865         | 0.9933 | 0.9944 | y=84038x+14540       | y=70943x+16772     | y=71621x+7238.7     |
| Tyrosine               | Tyr              | 0.11         | 0.09  | 0.08  | 0.38         | 0.31  | 0.25  | 0.25-25.00            | 0.25-30.00 | 0.25-20.00 | 0.9905         | 0.995  | 0.9956 | y=154990x+18819      | y=128700x+16351    | y=130000x+14760     |
| Putrescine             | Put              | 0.10         | 0.04  | 0.08  | 0.32         | 0.12  | 0.26  | 0.25-20.00            | 0.25-20.00 | 0.25-20.00 | 0.9912         | 0.9951 | 0.9917 | y=632210x+113100     | y=569010x+77417    | y=564250x+101050    |
| Methionine             | Met              | 0.09         | 0.03  | 0.07  | 0.29         | 0.10  | 0.23  | 0.25-15.00            | 0.25-20.00 | 0.25-20.00 | 0.9949         | 0.9946 | 0.9912 | y=751150x+75080      | y=571340x+64245    | y=534400x+69109     |
| Serotonin <sup>1</sup> | Stn <sup>1</sup> | 0.08         | 0.03  | 0.12  | 0.25         | 0.10  | 0.39  | 0.25-5.00             | 0.25-5.00  | 0.25-7.50  | 0.9908         | 0.9992 | 0.9882 | y=2161700x+160200    | y=1782800x+78256   | y=1620900x+222090   |
| Serotonin <sup>2</sup> | Stn <sup>2</sup> | 0.17         | 0.03  | 0.42  | 0.56         | 0.08  | 1.39  | 0.25-15.00            | 0.25-20.00 | 0.25-20.00 | 0.9904         | 0.9972 | 0.9694 | y=31572x+2602.1      | y=31062x+1033.9    | y=23389x+2350.9     |
| Valine                 | Val              | 0.09         | 0.05  | 0.11  | 0.28         | 0.15  | 0.37  | 0.25-15.00            | 0.25-10.00 | 0.25-20.00 | 0.989          | 0.9972 | 0.9873 | y=736370x+102230     | y=673670x+181120   | y=567960x+102060    |
| Cadaverine             | Cad              | 0.13         | 0.05  | 0.09  | 0.42         | 0.15  | 0.29  | 0.25-15.00            | 0.25-10.00 | 0.25-20.00 | 0.984          | 0.9955 | 0.9913 | y=689730x+152960     | y=645020x+48681    | y=547430x+106030    |
| Tyramine               | Tra              | 0.28         | 0.13  | 0.16  | 0.93         | 0.44  | 0.54  | 0.25-1.00             | 0.25-1.00  | 0.25-1.0   | 0.9649         | 0.9946 | 0.9782 | y=7583600x+554690    | y=6577500x+94653   | y=6118600x+127410   |
| Isoleucine             | Ile              | 1.04         | 0.03  | 0.16  | 3.47         | 0.10  | 0.52  | 0.25-1.00             | 0.25-5.00  | 0.25-5.00  | 0.9925         | 0.9943 | 0.9747 | y=3822900x-3670.2    | y=2493000x+431770  | y=2356600x+322130   |
| Leucine                | Leu              | 0.02         | 0.05  | 0.16  | 0.07         | 0.18  | 0.54  | 0.25-2.50             | 0.25-5.00  | 0.25-5.00  | 0.9927         | 0.9851 | 0.9771 | y=3502400x+164690    | y=2581300x+507180  | y=2410800x+298750   |
| Phenylalanine          | Phe              | 0.10         | 0.05  | 1.57  | 0.32         | 0.15  | 5.25  | 0.25-15.00            | 0.25-30.00 | 0.25-20.00 | 0.996          | 0.9971 | 0.9818 | y=503990x+35433      | y=412360x+55367    | y=400020x+35017     |
| Tryptophan             | Trp              | 0.10         | 0.04  | 0.41  | 0.33         | 0.13  | 1.37  | 0.25-15.00            | 0.25-30.00 | 0.25-20.00 | 0.9956         | 0.9936 | 0.9707 | y=560190x+32549      | y=432100x+45221    | y=413050x+29569     |
| Tryptamine             | Tpa              | 0.60         | 0.67  | 0.55  | 2.00         | 2.25  | 1.85  | 0.25-2.50             | 0.25-2.50  | 0.25-2.50  | 0.9641         | 0.9432 | 0.9506 | y=3685800x+385210    | y=3700100x+106100  | y=2748700x+354500   |
| 2-phenethyl-amine      | Pha              | 0.07         | 0.86  | 0.73  | 0.24         | 2.86  | 2.42  | 0.25-2.50             | 0.25-1.00  | 0.25-2.50  | 0.9402         | 0.9947 | 0.9533 | y=4511600x+1890500   | y=5292600x+373080  | y=5132000x+857750   |

**Table S3:** Intra- and interday accuracy and precision. RSD: relative standard deviation, QC: quality control.

| Compound     | QC concentration (μmol/L) | Intraday variability (n=5)  |       |       |      |       |       |           |        |        | Interday variability (n=15) |       |       |       |       |       |           |        |        |
|--------------|---------------------------|-----------------------------|-------|-------|------|-------|-------|-----------|--------|--------|-----------------------------|-------|-------|-------|-------|-------|-----------|--------|--------|
|              |                           | Mean concentration (μmol/L) |       |       | RSD% |       |       | Accuracy% |        |        | Mean concentration (μmol/L) |       |       | RSD%  |       |       | Accuracy% |        |        |
|              |                           | MQ                          | Serum | Tears | MQ   | Serum | Tears | MQ        | Serum  | Tears  | MQ                          | Serum | Tears | MQ    | Serum | Tears | MQ        | Serum  | Tears  |
| Histidine    | 2.5                       | 2.80                        | 2.82  | 2.78  | 1.23 | 0.83  | 0.72  | 112.18    | 112.83 | 111.15 | 2.79                        | 2.82  | 2.76  | 1.43  | 1.54  | 1.28  | 111.47    | 112.59 | 110.48 |
|              | 7.5                       | 8.13                        | 7.98  | 8.12  | 1.99 | 2.18  | 0.13  | 108.41    | 106.41 | 108.25 | 7.96                        | 7.89  | 7.99  | 2.07  | 1.73  | 2.32  | 106.12    | 105.14 | 106.59 |
|              | 15                        | 15.19                       | 16.57 | 16.76 | 6.22 | 0.27  | 1.84  | 101.25    | 110.48 | 111.71 | 15.98                       | 16.37 | 16.86 | 5.36  | 1.37  | 1.45  | 106.53    | 109.10 | 112.37 |
| Asparagine   | 2.5                       | 2.73                        | 2.71  | 2.76  | 3.41 | 0.72  | 0.88  | 109.13    | 108.37 | 110.24 | 2.73                        | 2.71  | 2.83  | 3.90  | 2.69  | 4.07  | 109.12    | 108.51 | 113.04 |
|              | 7.5                       | 8.20                        | 8.49  | 8.36  | 2.30 | 0.71  | 0.50  | 109.32    | 113.26 | 111.50 | 8.38                        | 8.58  | 8.28  | 2.35  | 2.68  | 1.87  | 111.71    | 114.35 | 110.36 |
|              | 15                        | 15.49                       | 16.43 | 17.10 | 1.95 | 1.65  | 0.59  | 103.29    | 109.56 | 114.00 | 15.95                       | 15.79 | 16.60 | 2.85  | 4.22  | 2.56  | 106.34    | 105.24 | 110.69 |
| Taurine      | 2.5                       | 2.40                        | 2.73  | 2.40  | 2.62 | 0.76  | 3.35  | 95.89     | 109.36 | 96.00  | 2.37                        | 2.79  | 2.45  | 2.40  | 3.15  | 2.98  | 94.75     | 111.51 | 97.83  |
|              | 7.5                       | 7.36                        | 8.30  | 7.97  | 1.31 | 0.52  | 1.10  | 98.10     | 110.60 | 106.29 | 7.34                        | 8.23  | 7.75  | 1.47  | 1.09  | 3.49  | 97.89     | 109.72 | 103.32 |
|              | 15                        | 13.96                       | 16.09 | 16.21 | 0.73 | 0.20  | 1.25  | 93.05     | 107.24 | 108.09 | 14.42                       | 15.41 | 16.17 | 2.47  | 4.57  | 0.91  | 96.15     | 102.74 | 107.79 |
| Serine       | 2.5                       | 2.57                        | 2.68  | 2.56  | 1.84 | 1.01  | 2.35  | 102.84    | 107.09 | 102.27 | 2.56                        | 2.69  | 2.60  | 2.37  | 1.08  | 1.93  | 102.29    | 107.51 | 103.93 |
|              | 7.5                       | 7.74                        | 8.36  | 8.33  | 0.60 | 0.46  | 1.24  | 103.19    | 111.47 | 111.04 | 7.71                        | 8.33  | 8.03  | 0.66  | 0.77  | 4.69  | 102.85    | 111.10 | 107.08 |
|              | 15                        | 14.19                       | 15.73 | 17.12 | 0.24 | 0.24  | 0.42  | 94.62     | 104.89 | 114.13 | 14.82                       | 15.04 | 16.70 | 3.15  | 4.55  | 1.94  | 98.82     | 100.25 | 111.33 |
| Glutamine    | 2.5                       | 2.73                        | 2.64  | 2.73  | 1.38 | 3.12  | 0.88  | 109.27    | 105.43 | 109.06 | 2.68                        | 2.58  | 2.66  | 2.19  | 4.54  | 3.29  | 107.04    | 103.32 | 106.48 |
|              | 7.5                       | 8.47                        | 8.08  | 8.00  | 2.10 | 2.89  | 1.34  | 112.87    | 107.72 | 106.72 | 8.32                        | 7.99  | 7.96  | 2.58  | 2.66  | 2.57  | 110.95    | 106.53 | 106.09 |
|              | 15                        | 16.48                       | 16.31 | 16.63 | 1.98 | 1.43  | 1.66  | 109.84    | 108.74 | 110.86 | 16.56                       | 16.33 | 16.33 | 1.74  | 2.38  | 3.29  | 110.42    | 108.84 | 108.88 |
| Arginine     | 2.5                       | 2.86                        | 2.52  | 2.51  | 6.22 | 1.45  | 4.04  | 114.22    | 100.85 | 100.44 | 2.50                        | 2.40  | 2.41  | 14.93 | 8.95  | 4.71  | 100.00    | 96.09  | 96.48  |
|              | 7.5                       | 8.31                        | 7.44  | 7.57  | 3.10 | 2.47  | 4.06  | 110.76    | 99.24  | 100.94 | 7.42                        | 7.32  | 6.86  | 9.36  | 7.39  | 14.98 | 98.97     | 97.64  | 91.51  |
|              | 15                        | 15.60                       | 16.34 | 13.80 | 3.65 | 1.22  | 2.40  | 104.02    | 108.90 | 91.99  | 14.69                       | 15.17 | 14.01 | 10.11 | 7.07  | 8.49  | 97.95     | 101.15 | 93.37  |
| Histamine    | 2.5                       | 2.25                        | 2.61  | 2.41  | 2.34 | 0.37  | 2.58  | 89.82     | 104.26 | 96.26  | 2.13                        | 2.59  | 2.26  | 7.99  | 1.80  | 8.50  | 85.36     | 103.65 | 90.46  |
|              | 7.5                       | 7.57                        | 6.82  | 7.15  | 2.58 | 1.25  | 1.43  | 100.87    | 90.92  | 95.26  | 6.82                        | 6.83  | 6.60  | 8.50  | 2.13  | 12.53 | 90.92     | 91.01  | 87.98  |
|              | 15                        | 13.47                       | 14.41 | 13.71 | 2.01 | 1.60  | 2.34  | 89.77     | 96.03  | 91.39  | 13.44                       | 13.37 | 14.00 | 2.79  | 6.16  | 3.79  | 89.63     | 89.15  | 93.36  |
| Glycine      | 2.5                       | 2.41                        | 2.74  | 2.67  | 2.20 | 2.23  | 1.88  | 96.25     | 109.67 | 106.76 | 2.46                        | 2.73  | 2.70  | 3.02  | 1.66  | 1.75  | 98.57     | 109.27 | 107.95 |
|              | 7.5                       | 7.58                        | 8.48  | 8.52  | 0.92 | 1.56  | 0.66  | 101.12    | 113.03 | 113.54 | 7.57                        | 8.44  | 8.21  | 1.13  | 1.09  | 4.63  | 100.86    | 112.57 | 109.49 |
|              | 15                        | 14.23                       | 16.15 | 16.98 | 1.26 | 0.89  | 0.48  | 94.84     | 107.64 | 113.20 | 14.91                       | 15.41 | 16.93 | 3.58  | 4.57  | 0.69  | 99.37     | 102.76 | 112.86 |
| Ethanolamine | 2.5                       | 2.55                        | 2.72  | 2.73  | 1.73 | 0.87  | 2.55  | 101.81    | 108.84 | 109.18 | 2.52                        | 2.77  | 2.68  | 1.61  | 2.50  | 2.80  | 100.81    | 110.65 | 107.22 |
|              | 7.5                       | 7.53                        | 8.21  | 8.21  | 0.93 | 1.01  | 1.08  | 100.34    | 109.50 | 109.41 | 7.55                        | 8.16  | 7.85  | 1.05  | 0.85  | 4.73  | 100.60    | 108.74 | 104.67 |
|              | 15                        | 13.96                       | 15.48 | 16.55 | 0.50 | 0.35  | 0.50  | 93.08     | 103.19 | 110.34 | 14.57                       | 14.79 | 16.15 | 2.90  | 4.81  | 2.03  | 97.11     | 98.57  | 107.65 |
| Aspartate    | 2.5                       | 2.52                        | 2.59  | 2.79  | 2.94 | 2.06  | 2.43  | 100.83    | 103.46 | 111.62 | 2.52                        | 2.58  | 2.82  | 2.84  | 6.95  | 2.86  | 100.69    | 103.06 | 112.67 |
|              | 7.5                       | 7.90                        | 8.42  | 8.07  | 1.10 | 1.04  | 0.65  | 105.28    | 112.27 | 107.60 | 7.94                        | 8.18  | 7.72  | 0.87  | 2.33  | 4.23  | 105.80    | 109.00 | 102.86 |
|              | 15                        | 14.26                       | 14.36 | 15.86 | 0.64 | 0.29  | 0.92  | 95.09     | 95.75  | 105.70 | 14.91                       | 14.99 | 15.12 | 3.95  | 2.14  | 3.87  | 99.42     | 93.30  | 100.77 |
| Methylamine  | 2.5                       | 2.66                        | 2.79  | 2.73  | 2.71 | 2.01  | 1.61  | 106.28    | 111.55 | 109.06 | 2.62                        | 2.74  | 2.81  | 3.11  | 5.53  | 3.23  | 104.77    | 109.41 | 112.46 |
|              | 7.5                       | 7.96                        | 8.49  | 8.33  | 1.47 | 0.64  | 1.53  | 106.13    | 113.21 | 111.05 | 8.03                        | 8.27  | 7.87  | 1.64  | 2.35  | 4.85  | 107.08    | 110.20 | 104.88 |
|              | 15                        | 14.48                       | 14.58 | 16.83 | 0.34 | 0.47  | 0.19  | 96.56     | 97.22  | 112.17 | 15.04                       | 14.36 | 15.90 | 4.41  | 2.21  | 4.57  | 100.30    | 95.73  | 105.99 |

|            |     |       |       |       |      |      |      |        |        |        |       |       |       |      |      |      |        |        |        |
|------------|-----|-------|-------|-------|------|------|------|--------|--------|--------|-------|-------|-------|------|------|------|--------|--------|--------|
| Glutamate  | 2.5 | 2.76  | 2.67  | 2.77  | 5.09 | 0.53 | 1.16 | 110.43 | 106.71 | 110.84 | 2.72  | 2.73  | 2.83  | 4.03 | 3.97 | 3.07 | 108.86 | 109.14 | 113.33 |
|            | 7.5 | 8.22  | 8.46  | 8.27  | 4.64 | 2.21 | 0.63 | 109.56 | 112.84 | 110.24 | 8.31  | 8.53  | 8.09  | 2.78 | 1.80 | 3.07 | 110.83 | 113.76 | 107.88 |
|            | 15  | 15.07 | 14.96 | 16.78 | 4.09 | 0.34 | 0.43 | 100.45 | 99.73  | 111.87 | 15.81 | 14.61 | 16.36 | 4.37 | 2.34 | 2.33 | 105.43 | 97.41  | 109.09 |
| Citrulline | 2.5 | 2.67  | 2.79  | 2.78  | 4.33 | 0.87 | 0.37 | 106.61 | 111.50 | 111.17 | 2.66  | 2.78  | 2.84  | 2.82 | 1.62 | 1.85 | 106.43 | 111.30 | 113.58 |
|            | 7.5 | 8.12  | 8.50  | 8.60  | 3.63 | 0.62 | 0.41 | 108.21 | 113.33 | 114.63 | 8.13  | 8.58  | 8.40  | 2.09 | 0.82 | 3.91 | 108.42 | 114.34 | 112.04 |
|            | 15  | 15.05 | 16.12 | 17.03 | 3.98 | 0.23 | 0.24 | 100.31 | 107.47 | 113.54 | 15.73 | 15.58 | 17.16 | 3.90 | 4.28 | 1.07 | 104.88 | 103.86 | 114.38 |
| Threonine  | 2.5 | 2.60  | 2.67  | 2.64  | 2.03 | 0.25 | 1.02 | 103.95 | 106.65 | 105.41 | 2.57  | 2.73  | 2.65  | 2.23 | 3.82 | 1.11 | 102.88 | 109.32 | 105.86 |
|            | 7.5 | 7.73  | 8.50  | 8.40  | 0.55 | 0.49 | 0.63 | 103.02 | 113.31 | 111.99 | 7.76  | 8.37  | 8.09  | 1.01 | 1.18 | 4.59 | 103.46 | 111.62 | 107.92 |
|            | 15  | 14.26 | 15.81 | 17.22 | 0.28 | 0.41 | 0.45 | 95.07  | 105.40 | 114.80 | 14.89 | 15.06 | 16.76 | 3.16 | 4.67 | 2.11 | 99.30  | 100.40 | 111.72 |
| Alanine    | 2.5 | 2.68  | 2.71  | 2.72  | 0.96 | 1.13 | 2.47 | 107.17 | 108.53 | 108.93 | 2.64  | 2.69  | 2.74  | 3.30 | 1.54 | 2.50 | 105.49 | 107.57 | 109.54 |
|            | 7.5 | 7.96  | 8.17  | 8.47  | 0.27 | 1.00 | 0.38 | 106.18 | 108.95 | 112.86 | 8.03  | 8.42  | 8.01  | 0.97 | 2.22 | 5.85 | 107.01 | 112.23 | 106.75 |
|            | 15  | 14.50 | 15.36 | 17.04 | 0.30 | 0.36 | 0.38 | 96.67  | 102.43 | 113.59 | 15.14 | 14.85 | 16.32 | 3.53 | 3.25 | 3.41 | 100.96 | 99.02  | 108.79 |
| Ethylamine | 2.5 | 2.61  | 2.76  | 2.82  | 2.68 | 1.59 | 1.34 | 104.50 | 110.33 | 112.98 | 2.57  | 2.68  | 2.84  | 2.00 | 6.32 | 2.09 | 102.84 | 107.29 | 113.42 |
|            | 7.5 | 8.15  | 8.53  | 8.44  | 0.65 | 0.23 | 0.57 | 108.63 | 113.78 | 112.55 | 8.17  | 8.38  | 7.95  | 1.32 | 1.72 | 4.74 | 108.97 | 111.75 | 105.99 |
|            | 15  | 14.89 | 14.52 | 16.99 | 0.17 | 0.26 | 0.25 | 99.28  | 96.81  | 113.26 | 15.41 | 14.42 | 15.86 | 5.19 | 1.27 | 5.64 | 102.74 | 96.11  | 105.75 |
| Proline    | 2.5 | 2.53  | 2.80  | 2.55  | 0.32 | 8.50 | 0.59 | 101.26 | 112.11 | 102.13 | 2.53  | 2.79  | 2.59  | 1.59 | 5.45 | 1.36 | 101.25 | 111.84 | 103.77 |
|            | 7.5 | 7.67  | 8.36  | 8.30  | 0.22 | 0.31 | 0.36 | 102.21 | 111.47 | 110.72 | 7.67  | 8.31  | 7.96  | 0.49 | 0.48 | 4.65 | 102.23 | 110.83 | 106.19 |
|            | 15  | 14.25 | 15.65 | 17.05 | 1.55 | 1.26 | 0.21 | 95.02  | 104.35 | 113.64 | 14.77 | 14.95 | 16.53 | 2.81 | 4.49 | 2.33 | 98.44  | 99.63  | 110.22 |
| Ornithine  | 2.5 | 2.70  | 2.82  | 2.78  | 1.33 | 0.27 | 0.32 | 108.15 | 112.89 | 111.22 | 2.72  | 2.80  | 2.86  | 1.27 | 0.73 | 2.50 | 108.94 | 112.13 | 114.49 |
|            | 7.5 | 7.97  | 8.55  | 8.54  | 1.03 | 0.25 | 0.27 | 106.32 | 114.02 | 113.88 | 8.11  | 8.44  | 8.10  | 1.64 | 1.03 | 4.64 | 108.11 | 112.54 | 108.01 |
|            | 15  | 14.39 | 15.04 | 17.01 | 0.37 | 0.20 | 0.46 | 95.94  | 100.26 | 113.43 | 15.21 | 14.49 | 16.35 | 4.45 | 3.97 | 3.39 | 101.37 | 96.60  | 108.99 |
| Cysteine   | 2.5 | 2.56  | 2.81  | 2.63  | 0.46 | 0.51 | 1.69 | 102.51 | 112.52 | 105.32 | 2.57  | 2.84  | 2.66  | 1.51 | 1.58 | 1.23 | 102.58 | 113.39 | 106.25 |
|            | 7.5 | 7.59  | 8.31  | 8.35  | 0.86 | 0.23 | 0.39 | 101.18 | 110.75 | 111.36 | 7.51  | 8.21  | 8.12  | 0.98 | 0.91 | 4.31 | 100.16 | 109.44 | 108.32 |
|            | 15  | 14.16 | 16.20 | 17.16 | 0.27 | 0.23 | 0.35 | 94.40  | 108.00 | 114.40 | 14.59 | 15.22 | 16.77 | 2.23 | 6.29 | 1.85 | 97.30  | 101.46 | 111.83 |
| Lysine     | 2.5 | 2.79  | 2.75  | 2.79  | 2.43 | 1.54 | 0.99 | 111.50 | 109.86 | 111.81 | 2.73  | 2.77  | 2.79  | 2.17 | 1.41 | 1.33 | 109.12 | 110.87 | 111.58 |
|            | 7.5 | 8.39  | 8.25  | 8.41  | 0.62 | 1.12 | 0.61 | 111.87 | 110.02 | 112.14 | 8.27  | 8.29  | 8.42  | 2.36 | 0.83 | 0.89 | 110.32 | 110.53 | 112.31 |
|            | 15  | 15.16 | 16.11 | 16.94 | 0.56 | 0.41 | 1.27 | 101.07 | 107.41 | 112.96 | 15.48 | 15.20 | 17.14 | 4.40 | 5.56 | 1.30 | 103.20 | 101.35 | 114.27 |
| Tyrosine   | 2.5 | 2.49  | 2.72  | 2.64  | 2.37 | 1.47 | 1.37 | 99.44  | 108.79 | 105.61 | 2.36  | 2.72  | 2.62  | 4.47 | 0.92 | 1.73 | 94.30  | 108.60 | 104.60 |
|            | 7.5 | 7.88  | 7.68  | 7.44  | 1.77 | 1.88 | 3.42 | 105.01 | 102.45 | 99.21  | 7.58  | 7.54  | 7.48  | 3.45 | 3.37 | 4.59 | 101.07 | 100.51 | 99.78  |
|            | 15  | 15.40 | 15.92 | 16.00 | 0.74 | 1.42 | 3.36 | 102.68 | 106.12 | 106.67 | 15.14 | 15.26 | 16.12 | 2.03 | 3.85 | 3.98 | 100.90 | 101.70 | 107.47 |
| Putrescine | 2.5 | 2.80  | 2.82  | 2.69  | 1.39 | 0.22 | 1.32 | 111.89 | 112.97 | 107.82 | 2.83  | 2.81  | 2.80  | 1.92 | 0.79 | 2.91 | 113.12 | 112.44 | 112.03 |
|            | 7.5 | 8.37  | 8.43  | 8.46  | 1.32 | 0.55 | 0.33 | 111.53 | 112.38 | 112.81 | 8.57  | 8.45  | 8.06  | 1.96 | 0.95 | 4.89 | 114.25 | 112.60 | 107.51 |
|            | 15  | 15.21 | 14.97 | 17.14 | 0.51 | 0.70 | 0.69 | 101.40 | 99.77  | 114.26 | 16.19 | 14.68 | 16.54 | 4.79 | 3.04 | 2.85 | 107.92 | 97.87  | 110.23 |
| Methionine | 2.5 | 2.73  | 2.81  | 2.50  | 2.04 | 0.47 | 1.07 | 109.01 | 112.38 | 100.13 | 2.72  | 2.79  | 2.52  | 1.25 | 1.71 | 2.85 | 108.65 | 111.96 | 100.61 |
|            | 7.5 | 8.17  | 8.03  | 8.29  | 0.74 | 0.84 | 0.82 | 108.96 | 107.08 | 110.56 | 8.07  | 8.04  | 8.39  | 1.55 | 1.11 | 2.52 | 107.59 | 107.16 | 111.91 |
|            | 15  | 15.20 | 16.93 | 16.92 | 0.23 | 1.12 | 1.09 | 101.34 | 112.87 | 112.79 | 15.67 | 16.31 | 16.95 | 2.30 | 4.51 | 0.79 | 104.47 | 108.75 | 113.03 |
| Serotonin  | 2.5 | 2.37  | 2.85  | 2.48  | 1.09 | 0.41 | 0.96 | 94.73  | 114.12 | 99.22  | 2.31  | 2.84  | 2.44  | 2.46 | 0.90 | 1.58 | 92.22  | 113.42 | 97.50  |
|            | 7.5 | 6.71  | 7.60  | 7.48  | 0.28 | 0.16 | 0.31 | 89.52  | 101.34 | 99.78  | 6.48  | 7.53  | 7.26  | 3.63 | 1.14 | 3.76 | 86.45  | 100.37 | 96.85  |

|                                |     |       |       |       |      |      |      |        |        |        |       |       |       |      |      |       |        |        |        |
|--------------------------------|-----|-------|-------|-------|------|------|------|--------|--------|--------|-------|-------|-------|------|------|-------|--------|--------|--------|
|                                | 15  | 12.85 | 15.17 | 15.71 | 0.18 | 0.16 | 0.25 | 85.66  | 101.13 | 104.73 | 12.93 | 14.39 | 15.53 | 1.31 | 5.62 | 0.93  | 86.18  | 95.96  | 103.53 |
| Valine                         | 2.5 | 2.71  | 2.81  | 2.61  | 1.29 | 1.32 | 3.41 | 108.37 | 112.39 | 104.26 | 2.63  | 2.76  | 2.62  | 2.94 | 3.08 | 4.44  | 105.32 | 110.46 | 104.69 |
|                                | 7.5 | 8.37  | 8.20  | 8.29  | 1.30 | 1.38 | 2.58 | 111.55 | 109.36 | 110.50 | 7.93  | 8.14  | 8.22  | 4.35 | 1.57 | 1.80  | 105.74 | 108.57 | 109.54 |
|                                | 15  | 15.77 | 16.84 | 16.81 | 0.14 | 1.17 | 1.97 | 105.15 | 112.23 | 112.07 | 15.67 | 16.16 | 16.20 | 1.65 | 4.15 | 3.14  | 104.49 | 107.70 | 108.02 |
| Cadaverine                     | 2.5 | 2.79  | 2.74  | 2.76  | 3.24 | 0.84 | 3.23 | 111.39 | 109.57 | 110.22 | 2.77  | 2.78  | 2.77  | 3.41 | 2.80 | 2.36  | 110.89 | 111.12 | 110.76 |
|                                | 7.5 | 8.45  | 8.55  | 8.35  | 1.11 | 0.14 | 1.76 | 112.68 | 113.98 | 111.39 | 8.58  | 8.61  | 8.39  | 1.57 | 1.43 | 1.59  | 114.41 | 114.84 | 111.84 |
|                                | 15  | 15.36 | 15.69 | 17.02 | 0.72 | 0.19 | 1.40 | 102.39 | 104.63 | 113.45 | 16.33 | 15.37 | 17.05 | 5.60 | 3.75 | 0.99  | 108.89 | 102.44 | 113.68 |
| Tyramine                       | 2.5 | 2.54  | 2.69  | 2.69  | 0.72 | 1.91 | 0.38 | 101.59 | 107.66 | 107.94 | 2.66  | 2.73  | 2.83  | 3.41 | 1.68 | 3.39  | 106.48 | 109.03 | 113.15 |
|                                | 7.5 | 7.68  | 8.40  | 7.85  | 0.81 | 0.28 | 0.65 | 102.33 | 112.00 | 104.61 | 7.91  | 8.52  | 7.96  | 2.30 | 2.55 | 3.70  | 105.52 | 113.62 | 106.10 |
|                                | 15  | 14.64 | 16.61 | 15.79 | 0.63 | 0.10 | 0.33 | 97.61  | 110.71 | 105.27 | 15.56 | 16.41 | 16.23 | 4.37 | 2.84 | 2.09  | 103.75 | 109.39 | 108.20 |
| Isoleucine                     | 2.5 | 2.52  | 2.77  | 2.82  | 1.10 | 5.54 | 1.17 | 100.81 | 110.97 | 112.67 | 2.56  | 2.7   | 2.75  | 2.32 | 3.22 | 2.27  | 102.47 | 110.86 | 109.95 |
|                                | 7.5 | 7.54  | 8.27  | 8.14  | 1.44 | 1.14 | 1.35 | 100.58 | 110.23 | 108.48 | 7.72  | 8.29  | 7.95  | 1.89 | 0.73 | 4.02  | 102.95 | 110.59 | 105.95 |
|                                | 15  | 13.82 | 15.34 | 16.29 | 1.76 | 1.18 | 1.31 | 92.13  | 102.29 | 108.61 | 14.78 | 14.89 | 16.03 | 4.89 | 3.62 | 1.47  | 98.52  | 99.24  | 106.85 |
| Leucine                        | 2.5 | 2.74  | 2.67  | 2.75  | 1.70 | 0.94 | 0.76 | 109.68 | 106.67 | 109.99 | 2.74  | 2.62  | 2.79  | 2.70 | 5.32 | 1.26  | 109.74 | 104.90 | 111.65 |
|                                | 7.5 | 7.73  | 8.26  | 8.39  | 0.46 | 0.31 | 0.48 | 103.09 | 110.17 | 111.81 | 7.83  | 8.15  | 7.53  | 1.32 | 1.02 | 14.45 | 104.40 | 108.69 | 100.36 |
|                                | 15  | 13.87 | 15.02 | 16.46 | 0.35 | 0.15 | 0.16 | 92.43  | 100.12 | 109.76 | 14.52 | 14.44 | 15.95 | 3.41 | 3.55 | 2.55  | 96.83  | 96.26  | 106.30 |
| Phenylalanine                  | 2.5 | 2.43  | 2.68  | 2.74  | 1.18 | 0.88 | 1.22 | 97.21  | 107.14 | 109.59 | 2.39  | 2.82  | 2.70  | 2.05 | 5.96 | 1.59  | 95.68  | 112.77 | 107.89 |
|                                | 7.5 | 7.47  | 8.42  | 8.36  | 0.70 | 0.66 | 0.94 | 99.61  | 112.25 | 111.46 | 7.33  | 8.32  | 8.13  | 1.58 | 1.00 | 3.68  | 97.74  | 110.98 | 108.41 |
|                                | 15  | 14.20 | 16.58 | 16.97 | 0.70 | 0.59 | 0.48 | 94.66  | 110.53 | 113.15 | 14.55 | 15.78 | 16.79 | 1.91 | 4.78 | 0.93  | 96.99  | 105.21 | 111.92 |
| Tryptophan                     | 2.5 | 2.76  | 2.79  | 2.73  | 0.72 | 0.83 | 0.65 | 110.57 | 111.92 | 109.01 | 2.81  | 2.82  | 2.74  | 2.63 | 1.28 | 0.97  | 112.38 | 112.71 | 109.56 |
|                                | 7.5 | 8.60  | 8.30  | 7.38  | 0.39 | 0.99 | 1.74 | 114.70 | 110.66 | 98.42  | 8.51  | 8.27  | 7.40  | 0.82 | 2.79 | 2.29  | 113.52 | 110.31 | 98.68  |
|                                | 15  | 16.21 | 16.97 | 16.95 | 0.74 | 1.06 | 0.87 | 108.09 | 113.12 | 113.02 | 16.60 | 17.15 | 16.96 | 1.78 | 1.51 | 1.01  | 110.69 | 114.36 | 113.04 |
| Tryptamine + 2-phenethyl-amine | 2.5 | 2.50  | 2.58  | 2.49  | 1.07 | 0.41 | 0.69 | 100.20 | 103.05 | 99.79  | 2.50  | 2.58  | 2.50  | 1.11 | 1.22 | 0.75  | 100.03 | 103.13 | 99.99  |
|                                | 7.5 | 7.39  | 8.13  | 7.93  | 0.25 | 0.19 | 0.32 | 98.57  | 108.39 | 105.78 | 7.34  | 8.11  | 7.82  | 0.95 | 0.44 | 2.61  | 97.80  | 108.16 | 104.20 |
|                                | 15  | 14.03 | 15.96 | 16.30 | 0.11 | 0.26 | 0.21 | 93.52  | 106.42 | 108.66 | 14.36 | 15.35 | 16.24 | 1.85 | 4.24 | 0.35  | 95.73  | 102.35 | 108.23 |

**Table S4:** Recovery and matrix effect. QC: quality control.

| Compound     | QC concentration (μmol/L) | Mean concentration (μmol/L) |       |       | Recovery % |        |        | Matrix effect % |        |
|--------------|---------------------------|-----------------------------|-------|-------|------------|--------|--------|-----------------|--------|
|              |                           | MQ                          | Serum | Tears | MQ         | Serum  | Tears  | Serum           | Tears  |
| Histidine    | 2.5                       | 2.80                        | 2.82  | 2.78  | 112.18     | 112.83 | 111.15 | 25.80           | -2.24  |
|              | 7.5                       | 8.13                        | 7.99  | 8.12  | 108.41     | 106.41 | 108.25 | 8.86            | 2.77   |
|              | 15                        | 15.19                       | 16.57 | 16.76 | 101.25     | 110.48 | 111.71 | -6.59           | -6.58  |
| Asparagine   | 2.5                       | 2.73                        | 2.71  | 2.76  | 109.13     | 108.37 | 110.24 | 7.44            | 7.98   |
|              | 7.5                       | 8.20                        | 8.49  | 8.36  | 109.32     | 113.26 | 111.50 | 0.08            | 2.90   |
|              | 15                        | 15.49                       | 16.43 | 17.10 | 103.29     | 109.56 | 114.00 | -3.06           | -6.21  |
| Taurine      | 2.5                       | 2.40                        | 2.73  | 2.40  | 95.89      | 109.36 | 96.00  | 6.00            | 2.47   |
|              | 7.5                       | 7.36                        | 8.30  | 7.97  | 98.10      | 110.60 | 106.29 | -3.86           | -0.27  |
|              | 15                        | 13.96                       | 16.09 | 16.21 | 93.05      | 107.24 | 108.09 | -8.78           | -6.29  |
| Serine       | 2.5                       | 2.57                        | 2.68  | 2.56  | 102.84     | 107.09 | 102.27 | 9.42            | -1.64  |
|              | 7.5                       | 7.74                        | 8.36  | 8.33  | 103.19     | 111.47 | 111.04 | -3.04           | -0.51  |
|              | 15                        | 14.19                       | 15.73 | 17.12 | 94.62      | 104.89 | 114.13 | -7.79           | -10.25 |
| Glutamine    | 2.5                       | 2.73                        | 2.64  | 2.73  | 109.27     | 105.43 | 109.06 | -22.04          | -13.25 |
|              | 7.5                       | 8.47                        | 8.08  | 8.00  | 112.87     | 107.72 | 106.72 | 2.48            | 2.48   |
|              | 15                        | 16.48                       | 16.31 | 16.63 | 109.84     | 108.74 | 110.86 | 4.56            | -1.44  |
| Arginine     | 2.5                       | 2.86                        | 2.52  | 2.51  | 114.22     | 100.85 | 100.44 | 17.07           | -8.06  |
|              | 7.5                       | 8.31                        | 7.44  | 7.57  | 110.76     | 99.24  | 100.94 | 19.64           | -2.35  |
|              | 15                        | 15.60                       | 16.34 | 13.80 | 104.02     | 108.90 | 91.99  | 6.82            | 2.72   |
| Histamine    | 2.5                       | 2.25                        | 2.61  | 2.41  | 89.82      | 104.26 | 96.26  | 16.35           | 2.87   |
|              | 7.5                       | 7.57                        | 6.82  | 7.15  | 100.87     | 90.92  | 95.26  | 18.67           | 9.81   |
|              | 15                        | 13.47                       | 14.41 | 13.71 | 89.77      | 96.03  | 91.39  | -2.91           | 1.54   |
| Glycine      | 2.5                       | 2.41                        | 2.74  | 2.67  | 96.25      | 109.67 | 106.76 | 6.64            | 1.49   |
|              | 7.5                       | 7.58                        | 8.48  | 8.52  | 101.12     | 113.03 | 113.54 | -4.78           | -0.12  |
|              | 15                        | 14.23                       | 16.15 | 16.98 | 94.84      | 107.64 | 113.20 | -9.54           | -6.47  |
| Ethanolamine | 2.5                       | 2.55                        | 2.72  | 2.73  | 101.81     | 108.84 | 109.18 | 11.01           | -2.06  |
|              | 7.5                       | 7.53                        | 8.21  | 8.21  | 100.34     | 109.50 | 109.41 | -2.32           | -1.20  |
|              | 15                        | 13.96                       | 15.48 | 16.55 | 93.08      | 103.19 | 110.34 | -6.62           | -9.35  |
| Aspartate    | 2.5                       | 2.52                        | 2.59  | 2.79  | 100.83     | 103.46 | 111.62 | 2.67            | 0.21   |
|              | 7.5                       | 7.90                        | 8.42  | 8.07  | 105.28     | 112.27 | 107.60 | -5.00           | -0.03  |
|              | 15                        | 14.26                       | 14.36 | 15.86 | 95.09      | 95.75  | 105.70 | 0.11            | -10.98 |
| Methylamine  | 2.5                       | 2.66                        | 2.79  | 2.73  | 106.28     | 111.55 | 109.06 | 2.47            | 3.45   |
|              | 7.5                       | 7.96                        | 8.49  | 8.33  | 106.13     | 113.21 | 111.05 | -4.62           | -0.16  |
|              | 15                        | 14.48                       | 14.58 | 16.83 | 96.56      | 97.22  | 112.17 | 0.23            | -11.67 |
| Glutamate    | 2.5                       | 2.76                        | 2.67  | 2.77  | 110.43     | 106.71 | 110.84 | 3.01            | 2.47   |
|              | 7.5                       | 8.22                        | 8.46  | 8.27  | 109.56     | 112.84 | 110.24 | -6.55           | 1.67   |
|              | 15                        | 15.07                       | 14.96 | 16.78 | 100.45     | 99.73  | 111.87 | -3.35           | -8.97  |
| Citrulline   | 2.5                       | 2.67                        | 2.79  | 2.78  | 106.61     | 111.50 | 111.17 | 11.58           | 1.49   |
|              | 7.5                       | 8.12                        | 8.50  | 8.60  | 108.21     | 113.33 | 114.63 | -0.54           | 1.12   |
|              | 15                        | 15.05                       | 16.12 | 17.03 | 100.31     | 107.47 | 113.54 | -5.69           | -5.35  |
| Threonine    | 2.5                       | 2.60                        | 2.67  | 2.64  | 103.95     | 106.65 | 105.41 | 9.73            | -1.07  |
|              | 7.5                       | 7.73                        | 8.50  | 8.40  | 103.02     | 113.31 | 111.99 | -4.95           | -0.77  |
|              | 15                        | 14.26                       | 15.81 | 17.22 | 95.07      | 105.40 | 114.80 | -7.48           | -9.99  |
| Alanine      | 2.5                       | 2.68                        | 2.71  | 2.72  | 107.17     | 108.53 | 108.93 | -6.35           | 1.30   |
|              | 7.5                       | 7.96                        | 8.17  | 8.47  | 106.18     | 108.95 | 112.86 | -3.67           | -1.21  |
|              | 15                        | 14.50                       | 15.36 | 17.04 | 96.67      | 102.43 | 113.59 | -6.09           | -11.37 |
| Ethylamine   | 2.5                       | 2.61                        | 2.76  | 2.82  | 104.50     | 110.33 | 112.98 | 3.77            | 3.99   |
|              | 7.5                       | 8.15                        | 8.53  | 8.44  | 108.63     | 113.78 | 112.55 | -2.28           | 0.90   |
|              | 15                        | 14.89                       | 14.52 | 16.99 | 99.28      | 96.81  | 113.26 | 3.34            | -10.99 |
| Proline      | 2.5                       | 2.53                        | 2.80  | 2.55  | 101.26     | 112.11 | 102.13 | 1.44            | 0.58   |
|              | 7.5                       | 7.67                        | 8.36  | 8.30  | 102.21     | 111.47 | 110.72 | -4.51           | -0.31  |
|              | 15                        | 14.25                       | 15.65 | 17.05 | 95.02      | 104.35 | 113.64 | -7.00           | -9.12  |
| Ornithine    | 2.5                       | 2.70                        | 2.82  | 2.78  | 108.15     | 112.89 | 111.22 | 4.54            | 0.79   |

|                                   |     |       |       |       |        |        |        |       |        |
|-----------------------------------|-----|-------|-------|-------|--------|--------|--------|-------|--------|
|                                   | 7.5 | 7.97  | 8.55  | 8.54  | 106.32 | 114.02 | 113.88 | -5.21 | -1.98  |
|                                   | 15  | 14.39 | 15.04 | 17.01 | 95.94  | 100.26 | 113.43 | -4.00 | -12.21 |
| Cysteine                          | 2.5 | 2.56  | 2.81  | 2.63  | 102.51 | 112.52 | 105.32 | 7.14  | 0.14   |
|                                   | 7.5 | 7.59  | 8.31  | 8.35  | 101.18 | 110.75 | 111.36 | -1.59 | 0.37   |
|                                   | 15  | 14.16 | 16.20 | 17.16 | 94.40  | 108.00 | 114.40 | -8.48 | -7.89  |
| Lysine                            | 2.5 | 2.79  | 2.75  | 2.80  | 111.50 | 109.86 | 111.81 | 7.76  | 17.14  |
|                                   | 7.5 | 8.39  | 8.25  | 8.41  | 111.87 | 110.02 | 112.14 | 4.98  | 15.81  |
|                                   | 15  | 15.16 | 16.11 | 16.94 | 101.07 | 107.41 | 112.96 | -3.44 | 5.78   |
| Tyrosine                          | 2.5 | 2.49  | 2.72  | 2.64  | 99.44  | 108.79 | 105.61 | 13.94 | 12.59  |
|                                   | 7.5 | 7.88  | 7.68  | 7.44  | 105.01 | 102.45 | 99.21  | 13.10 | 23.25  |
|                                   | 15  | 15.40 | 15.92 | 16.00 | 102.68 | 106.12 | 106.67 | 4.88  | 15.85  |
| Putrescine                        | 2.5 | 2.80  | 2.82  | 2.70  | 111.89 | 112.97 | 107.82 | 8.67  | 3.27   |
|                                   | 7.5 | 8.37  | 8.43  | 8.46  | 111.53 | 112.38 | 112.81 | -2.45 | -1.02  |
|                                   | 15  | 15.21 | 14.97 | 17.14 | 101.40 | 99.77  | 114.26 | -2.45 | -12.42 |
| Methionine                        | 2.5 | 2.73  | 2.81  | 2.50  | 109.01 | 112.38 | 100.13 | 15.00 | 14.97  |
|                                   | 7.5 | 8.17  | 8.03  | 8.29  | 108.96 | 107.08 | 110.56 | 10.38 | 12.56  |
|                                   | 15  | 15.20 | 16.93 | 16.92 | 101.34 | 112.87 | 112.79 | -4.34 | 5.64   |
| Serotonin                         | 2.5 | 2.37  | 2.85  | 2.48  | 94.73  | 114.12 | 99.22  | 18.20 | -3.14  |
|                                   | 7.5 | 6.71  | 7.60  | 7.48  | 89.52  | 101.34 | 99.78  | 0.99  | 0.13   |
|                                   | 15  | 12.85 | 15.17 | 15.71 | 85.66  | 101.13 | 104.73 | -9.76 | -7.05  |
| Valine                            | 2.5 | 2.71  | 2.81  | 2.61  | 108.37 | 112.39 | 104.26 | 9.67  | 41.86  |
|                                   | 7.5 | 8.37  | 8.20  | 8.29  | 111.55 | 109.36 | 110.50 | 11.20 | 40.64  |
|                                   | 15  | 15.77 | 16.83 | 16.81 | 105.15 | 112.23 | 112.07 | 2.34  | 36.26  |
| Cadaverine                        | 2.5 | 2.79  | 2.74  | 2.76  | 111.39 | 109.57 | 110.22 | 13.49 | 20.26  |
|                                   | 7.5 | 8.45  | 8.55  | 8.35  | 112.68 | 113.98 | 111.39 | 1.09  | 19.35  |
|                                   | 15  | 15.36 | 15.69 | 17.02 | 102.39 | 104.63 | 113.45 | -2.10 | 9.35   |
| Tyramine                          | 2.5 | 2.54  | 2.69  | 2.70  | 101.59 | 107.66 | 107.94 | 14.86 | -1.77  |
|                                   | 7.5 | 7.68  | 8.40  | 7.85  | 102.33 | 112.00 | 104.61 | -1.35 | -0.01  |
|                                   | 15  | 14.64 | 16.61 | 15.79 | 97.61  | 110.71 | 105.27 | -8.30 | -6.08  |
| Isoleucine                        | 2.5 | 2.52  | 2.77  | 2.82  | 100.81 | 110.97 | 112.67 | 3.57  | 0.16   |
|                                   | 7.5 | 7.54  | 8.27  | 8.14  | 100.58 | 110.23 | 108.48 | -4.96 | -1.45  |
|                                   | 15  | 13.82 | 15.34 | 16.29 | 92.13  | 102.29 | 108.61 | -8.44 | -12.37 |
| Leucine                           | 2.5 | 2.74  | 2.67  | 2.75  | 109.68 | 106.67 | 109.99 | -2.04 | 3.61   |
|                                   | 7.5 | 7.73  | 8.26  | 8.39  | 103.09 | 110.17 | 111.81 | -4.42 | 0.36   |
|                                   | 15  | 13.87 | 15.02 | 16.46 | 92.43  | 100.12 | 109.76 | -4.13 | -7.91  |
| Phenylalanine                     | 2.5 | 2.43  | 2.68  | 2.74  | 97.21  | 107.14 | 109.59 | 13.18 | -2.49  |
|                                   | 7.5 | 7.47  | 8.42  | 8.36  | 99.61  | 112.25 | 111.46 | -2.22 | -0.30  |
|                                   | 15  | 14.20 | 16.58 | 16.97 | 94.66  | 110.53 | 113.15 | -9.07 | -6.79  |
| Tryptophan                        | 2.5 | 2.76  | 2.80  | 2.73  | 110.57 | 111.92 | 109.01 | 21.87 | 0.67   |
|                                   | 7.5 | 8.60  | 8.30  | 7.38  | 114.70 | 110.66 | 98.42  | 14.04 | 21.59  |
|                                   | 15  | 16.21 | 16.97 | 16.95 | 108.09 | 113.12 | 113.02 | 3.57  | 6.09   |
| Tryptamine +<br>2-phenethyl-amine | 2.5 | 2.50  | 2.58  | 2.50  | 100.20 | 103.05 | 99.79  | 18.39 | -0.57  |
|                                   | 7.5 | 7.39  | 8.13  | 7.93  | 98.57  | 108.39 | 105.78 | -0.17 | 0.96   |
|                                   | 15  | 14.03 | 15.96 | 16.30 | 93.52  | 106.42 | 108.66 | -6.54 | -4.92  |

**Table S5:** Autosampler stability and freeze-thaw stability. QC: quality control.

| Compound     | QC concentration (μmol/L) | Autosampler stability       |       |       |           |        |        | Freeze-thaw cycle before derivatization |       |       |           |        |        | Freeze-thaw cycle after derivatization |       |       |           |       |       |
|--------------|---------------------------|-----------------------------|-------|-------|-----------|--------|--------|-----------------------------------------|-------|-------|-----------|--------|--------|----------------------------------------|-------|-------|-----------|-------|-------|
|              |                           | Mean concentration (μmol/L) |       |       | Recovery% |        |        | Mean concentration (μmol/L)             |       |       | Recovery% |        |        | Mean concentration (μmol/L)            |       |       | Recovery% |       |       |
|              |                           | MQ                          | Serum | Tears | MQ        | Serum  | Tears  | MQ                                      | Serum | Tears | MQ        | Serum  | Tears  | MQ                                     | Serum | Tears | MQ        | Serum | Tears |
| Histidine    | 2.5                       | 1.82                        | 2.35  | 2.04  | 72.91     | 93.94  | 81.40  | 1.03                                    | 1.67  | 1.20  | 41.27     | 66.64  | 47.94  | 1.49                                   | 1.59  | 1.22  | 59.50     | 63.69 | 48.83 |
|              | 7.5                       | 6.65                        | 7.39  | 5.81  | 88.65     | 98.58  | 77.41  | 5.41                                    | 4.13  | 5.31  | 72.16     | 55.02  | 70.76  | 5.13                                   | 5.88  | 5.20  | 68.38     | 78.40 | 69.31 |
|              | 15                        | 13.74                       | 13.42 | 15.01 | 91.62     | 89.47  | 100.08 | 9.17                                    | 10.50 | 10.74 | 61.11     | 69.96  | 71.61  | 8.78                                   | 10.67 | 11.12 | 58.55     | 71.15 | 74.12 |
| Asparagine   | 2.5                       | 2.34                        | 2.23  | 2.33  | 93.66     | 89.19  | 93.34  | 1.72                                    | 2.27  | 2.12  | 68.62     | 90.75  | 84.60  | 1.91                                   | 2.11  | 2.09  | 76.20     | 84.22 | 83.72 |
|              | 7.5                       | 6.98                        | 6.76  | 6.80  | 93.04     | 90.17  | 90.72  | 6.69                                    | 5.78  | 6.84  | 89.20     | 77.06  | 91.15  | 5.61                                   | 6.05  | 6.04  | 74.79     | 80.67 | 80.56 |
|              | 15                        | 13.27                       | 12.84 | 14.02 | 88.46     | 85.57  | 93.48  | 11.42                                   | 13.52 | 12.13 | 76.15     | 90.14  | 80.84  | 9.86                                   | 12.54 | 12.52 | 65.70     | 83.57 | 83.48 |
| Taurine      | 2.5                       | 2.31                        | 2.68  | 2.28  | 92.20     | 106.98 | 91.10  | 1.87                                    | 2.65  | 1.93  | 74.87     | 105.99 | 77.33  | 2.12                                   | 2.44  | 2.03  | 84.95     | 97.41 | 81.19 |
|              | 7.5                       | 7.21                        | 7.79  | 7.31  | 96.07     | 103.88 | 97.50  | 7.06                                    | 6.44  | 7.46  | 94.14     | 85.83  | 99.41  | 6.35                                   | 7.10  | 6.74  | 84.71     | 94.62 | 89.82 |
|              | 15                        | 14.00                       | 13.98 | 15.75 | 93.36     | 93.21  | 105.02 | 12.14                                   | 14.47 | 13.15 | 80.96     | 96.44  | 87.65  | 11.07                                  | 13.85 | 14.25 | 73.82     | 92.35 | 94.97 |
| Serine       | 2.5                       | 2.41                        | 2.64  | 2.17  | 96.44     | 105.45 | 86.78  | 1.71                                    | 2.57  | 1.85  | 68.46     | 102.68 | 74.11  | 2.09                                   | 2.34  | 1.87  | 83.54     | 93.61 | 74.69 |
|              | 7.5                       | 7.25                        | 7.42  | 7.22  | 96.65     | 98.89  | 96.30  | 6.85                                    | 6.01  | 7.24  | 91.26     | 80.09  | 96.52  | 6.03                                   | 6.58  | 6.34  | 80.45     | 87.78 | 84.55 |
|              | 15                        | 13.86                       | 13.50 | 15.62 | 92.39     | 89.99  | 104.16 | 11.63                                   | 13.67 | 12.76 | 77.55     | 91.16  | 85.09  | 10.04                                  | 12.82 | 13.32 | 66.92     | 85.48 | 88.79 |
| Glutamine    | 2.5                       | 2.22                        | 1.97  | 1.92  | 88.64     | 78.76  | 76.65  | 0.84                                    | 1.57  | 0.86  | 33.61     | 62.78  | 34.31  | 1.31                                   | 1.30  | 0.88  | 52.30     | 52.05 | 35.38 |
|              | 7.5                       | 6.77                        | 6.76  | 4.98  | 90.28     | 90.12  | 66.43  | 3.62                                    | 2.72  | 3.37  | 48.27     | 36.23  | 44.89  | 3.68                                   | 3.69  | 3.22  | 49.04     | 49.19 | 42.87 |
|              | 15                        | 12.63                       | 11.70 | 13.10 | 84.20     | 77.99  | 87.34  | 4.70                                    | 5.60  | 6.36  | 31.35     | 39.91  | 42.37  | 4.48                                   | 5.53  | 5.50  | 29.88     | 36.83 | 36.67 |
| Arginine     | 2.5                       | 2.96                        | 2.41  | 2.56  | 118.43    | 96.57  | 102.50 | 1.10                                    | 0.74  | 0.81  | 43.97     | 29.40  | 32.27  | 1.82                                   | 0.84  | 1.23  | 72.74     | 33.65 | 49.02 |
|              | 7.5                       | 8.38                        | 9.01  | 5.76  | 111.78    | 120.12 | 76.76  | 3.41                                    | 1.81  | 2.69  | 45.45     | 24.12  | 35.85  | 4.73                                   | 4.89  | 4.05  | 63.03     | 65.20 | 53.94 |
|              | 15                        | 15.62                       | 15.82 | 14.78 | 104.15    | 105.45 | 98.53  | 4.55                                    | 4.54  | 5.15  | 30.35     | 30.30  | 34.33  | 6.76                                   | 7.79  | 7.32  | 45.03     | 51.91 | 48.78 |
| Histamine    | 2.5                       | 2.37                        | 2.85  | 2.32  | 94.90     | 114.09 | 92.97  | 1.17                                    | 1.90  | 1.50  | 46.91     | 76.11  | 60.09  | 1.85                                   | 2.12  | 1.81  | 73.89     | 84.64 | 72.36 |
|              | 7.5                       | 7.22                        | 7.90  | 6.49  | 96.29     | 105.31 | 86.60  | 4.75                                    | 4.22  | 4.72  | 63.37     | 56.29  | 62.95  | 5.21                                   | 6.18  | 5.43  | 69.46     | 82.37 | 72.42 |
|              | 15                        | 14.08                       | 13.91 | 14.69 | 93.84     | 92.76  | 97.95  | 7.80                                    | 9.15  | 8.35  | 51.96     | 60.99  | 55.66  | 8.78                                   | 10.95 | 10.88 | 58.56     | 72.97 | 72.50 |
| Glycine      | 2.5                       | 2.27                        | 2.76  | 2.22  | 90.58     | 110.19 | 88.83  | 1.59                                    | 2.62  | 2.02  | 63.73     | 104.96 | 80.61  | 1.95                                   | 2.42  | 2.00  | 78.09     | 96.78 | 80.14 |
|              | 7.5                       | 7.27                        | 7.80  | 7.39  | 96.91     | 104.01 | 98.58  | 6.85                                    | 6.18  | 7.34  | 91.34     | 82.35  | 97.82  | 5.90                                   | 6.77  | 6.55  | 78.72     | 90.20 | 87.32 |
|              | 15                        | 14.09                       | 14.01 | 16.01 | 93.96     | 93.43  | 106.70 | 11.74                                   | 14.16 | 13.00 | 78.30     | 94.38  | 86.65  | 10.17                                  | 13.63 | 13.88 | 67.83     | 90.84 | 92.52 |
| Ethanolamine | 2.5                       | 2.41                        | 2.64  | 2.32  | 96.47     | 105.39 | 92.86  | 1.67                                    | 2.49  | 1.95  | 66.77     | 99.61  | 78.10  | 2.06                                   | 2.34  | 1.99  | 82.29     | 93.62 | 79.98 |
|              | 7.5                       | 7.50                        | 7.66  | 7.53  | 100.04    | 102.16 | 100.38 | 7.16                                    | 6.25  | 7.51  | 95.44     | 83.36  | 100.08 | 6.18                                   | 6.85  | 6.45  | 82.40     | 91.28 | 85.98 |
|              | 15                        | 14.29                       | 13.97 | 15.97 | 95.29     | 93.12  | 106.48 | 12.18                                   | 14.29 | 13.10 | 81.23     | 95.30  | 87.31  | 10.35                                  | 13.47 | 13.70 | 69.01     | 89.77 | 91.33 |
| Aspartate    | 2.5                       | 2.56                        | 2.30  | 2.50  | 102.48    | 91.87  | 99.94  | 1.35                                    | 2.18  | 2.19  | 54.05     | 87.06  | 87.39  | 1.79                                   | 1.98  | 1.98  | 71.56     | 79.16 | 79.07 |
|              | 7.5                       | 8.15                        | 7.32  | 7.60  | 108.62    | 97.59  | 101.30 | 7.31                                    | 6.14  | 7.49  | 97.47     | 81.87  | 99.85  | 6.18                                   | 6.26  | 6.03  | 82.38     | 83.53 | 80.35 |
|              | 15                        | 15.20                       | 14.47 | 15.60 | 101.31    | 96.45  | 104.00 | 12.73                                   | 14.85 | 13.20 | 84.89     | 98.99  | 87.99  | 10.26                                  | 13.60 | 12.90 | 68.38     | 90.68 | 86.01 |
| Methylamine  | 2.5                       | 2.54                        | 2.33  | 2.28  | 101.43    | 93.09  | 91.09  | 1.43                                    | 2.37  | 1.94  | 57.07     | 94.84  | 77.73  | 1.81                                   | 2.05  | 1.85  | 72.29     | 81.82 | 73.99 |
|              | 7.5                       | 8.01                        | 7.28  | 7.52  | 106.78    | 97.10  | 100.24 | 7.28                                    | 6.09  | 7.31  | 97.01     | 81.22  | 97.51  | 5.48                                   | 6.01  | 5.82  | 73.07     | 80.07 | 77.62 |
|              | 15                        | 15.03                       | 14.43 | 16.07 | 100.22    | 96.22  | 107.15 | 12.38                                   | 14.84 | 13.67 | 82.50     | 98.95  | 91.14  | 9.58                                   | 13.41 | 12.92 | 63.87     | 89.37 | 86.16 |



|            |     |       |       |       |        |        |        |       |       |       |       |        |        |       |       |       |       |        |        |
|------------|-----|-------|-------|-------|--------|--------|--------|-------|-------|-------|-------|--------|--------|-------|-------|-------|-------|--------|--------|
| Glutamate  | 2.5 | 2.71  | 2.32  | 2.45  | 108.36 | 92.94  | 97.79  | 1.68  | 2.22  | 2.05  | 67.27 | 88.88  | 81.94  | 2.04  | 2.01  | 2.08  | 81.73 | 80.38  | 83.19  |
|            | 7.5 | 8.18  | 7.23  | 7.57  | 109.03 | 96.37  | 100.96 | 7.10  | 5.56  | 7.15  | 94.70 | 74.15  | 95.27  | 6.17  | 6.11  | 6.21  | 82.29 | 81.54  | 82.74  |
|            | 15  | 15.28 | 13.89 | 15.94 | 101.86 | 92.59  | 106.25 | 11.92 | 13.24 | 12.64 | 79.48 | 88.23  | 84.30  | 10.10 | 12.61 | 12.92 | 67.31 | 84.06  | 86.10  |
| Citrulline | 2.5 | 2.49  | 2.73  | 2.48  | 99.65  | 109.23 | 99.54  | 1.71  | 2.49  | 2.02  | 68.22 | 99.59  | 80.90  | 2.14  | 2.40  | 2.16  | 85.73 | 95.78  | 86.24  |
|            | 7.5 | 7.48  | 7.65  | 7.49  | 99.67  | 101.99 | 99.90  | 6.73  | 5.79  | 7.09  | 89.71 | 77.22  | 94.57  | 6.26  | 6.70  | 6.59  | 83.46 | 89.37  | 87.82  |
|            | 15  | 14.26 | 13.82 | 15.79 | 95.09  | 92.11  | 105.30 | 11.44 | 13.12 | 12.20 | 76.27 | 87.49  | 81.33  | 10.40 | 12.93 | 13.53 | 69.33 | 86.22  | 90.16  |
| Threonine  | 2.5 | 2.43  | 2.56  | 2.17  | 97.09  | 102.37 | 86.63  | 1.76  | 2.50  | 1.98  | 70.20 | 100.09 | 79.09  | 2.05  | 2.35  | 1.90  | 81.82 | 94.11  | 76.15  |
|            | 7.5 | 7.70  | 7.53  | 7.31  | 102.60 | 100.46 | 97.42  | 7.35  | 6.15  | 7.61  | 98.06 | 81.93  | 101.51 | 6.42  | 6.82  | 6.94  | 85.62 | 90.99  | 92.53  |
|            | 15  | 15.02 | 14.58 | 16.86 | 100.14 | 97.18  | 112.39 | 12.91 | 14.80 | 14.08 | 86.09 | 98.67  | 93.85  | 10.39 | 13.59 | 14.41 | 69.25 | 90.61  | 96.08  |
| Alanine    | 2.5 | 2.45  | 2.20  | 2.23  | 97.93  | 87.96  | 89.34  | 1.76  | 2.32  | 2.04  | 70.29 | 92.87  | 81.47  | 1.94  | 1.97  | 1.94  | 77.65 | 78.81  | 77.50  |
|            | 7.5 | 7.44  | 6.74  | 6.93  | 99.16  | 89.90  | 92.40  | 7.39  | 6.24  | 7.64  | 98.51 | 83.13  | 101.88 | 5.58  | 5.89  | 5.76  | 74.40 | 78.50  | 76.84  |
|            | 15  | 14.61 | 13.28 | 14.57 | 97.40  | 88.53  | 97.11  | 11.85 | 14.56 | 13.15 | 78.97 | 97.07  | 87.68  | 9.26  | 12.60 | 12.18 | 61.70 | 84.00  | 81.22  |
| Ethylamine | 2.5 | 2.50  | 2.27  | 2.32  | 100.05 | 90.63  | 92.82  | 1.35  | 2.24  | 1.91  | 54.08 | 89.69  | 76.55  | 1.62  | 1.96  | 1.88  | 64.87 | 78.37  | 75.21  |
|            | 7.5 | 7.85  | 7.08  | 7.66  | 104.64 | 94.37  | 102.14 | 6.61  | 5.95  | 6.70  | 88.19 | 79.33  | 89.27  | 5.00  | 5.93  | 5.59  | 66.61 | 79.05  | 74.47  |
|            | 15  | 14.35 | 14.07 | 15.63 | 95.70  | 93.78  | 104.17 | 11.30 | 14.35 | 12.97 | 75.36 | 95.67  | 86.47  | 9.53  | 13.35 | 11.80 | 63.54 | 89.00  | 78.68  |
| Proline    | 2.5 | 2.38  | 2.51  | 2.19  | 95.18  | 100.47 | 87.75  | 1.74  | 2.52  | 1.91  | 69.44 | 100.77 | 76.23  | 2.00  | 2.30  | 1.89  | 80.00 | 91.84  | 75.60  |
|            | 7.5 | 7.36  | 7.31  | 7.51  | 98.07  | 97.48  | 100.17 | 7.19  | 6.15  | 7.25  | 95.87 | 81.98  | 96.67  | 6.15  | 6.75  | 6.28  | 82.04 | 89.96  | 83.67  |
|            | 15  | 14.13 | 13.46 | 15.57 | 94.19  | 89.75  | 103.82 | 11.65 | 13.72 | 13.36 | 77.67 | 91.48  | 89.07  | 9.97  | 13.30 | 13.75 | 66.44 | 88.64  | 91.63  |
| Ornithine  | 2.5 | 2.58  | 2.29  | 2.16  | 103.11 | 91.82  | 86.44  | 1.63  | 2.53  | 2.10  | 65.06 | 101.17 | 83.88  | 1.85  | 2.09  | 1.90  | 74.08 | 83.60  | 75.99  |
|            | 7.5 | 7.17  | 6.72  | 7.03  | 95.62  | 89.53  | 93.66  | 7.43  | 6.22  | 7.68  | 99.00 | 82.91  | 102.35 | 5.45  | 5.98  | 5.63  | 72.66 | 79.79  | 75.08  |
|            | 15  | 14.88 | 12.82 | 14.91 | 99.23  | 85.47  | 99.43  | 12.75 | 14.56 | 13.31 | 84.99 | 97.05  | 88.75  | 9.49  | 12.34 | 12.25 | 63.27 | 82.28  | 81.63  |
| Cysteine   | 2.5 | 2.25  | 2.53  | 2.16  | 90.18  | 101.13 | 86.47  | 1.73  | 2.51  | 1.92  | 69.08 | 100.46 | 76.87  | 1.98  | 2.31  | 1.86  | 79.12 | 92.48  | 74.49  |
|            | 7.5 | 6.73  | 7.22  | 6.98  | 89.70  | 96.31  | 93.12  | 6.59  | 5.88  | 7.15  | 87.91 | 78.44  | 95.35  | 5.96  | 6.64  | 6.47  | 79.51 | 88.56  | 86.24  |
|            | 15  | 13.28 | 13.11 | 15.39 | 88.53  | 87.42  | 102.59 | 11.41 | 13.58 | 12.29 | 76.08 | 90.54  | 81.93  | 10.33 | 12.87 | 13.75 | 68.87 | 85.77  | 91.65  |
| Lysine     | 2.5 | 2.47  | 2.29  | 2.55  | 98.85  | 91.57  | 102.04 | 1.41  | 2.23  | 2.14  | 56.47 | 89.00  | 85.76  | 1.84  | 2.11  | 2.25  | 73.43 | 84.28  | 89.91  |
|            | 7.5 | 7.50  | 6.92  | 8.06  | 100.00 | 92.26  | 107.50 | 6.53  | 6.82  | 7.63  | 86.99 | 90.91  | 101.71 | 5.55  | 6.00  | 6.52  | 73.93 | 80.00  | 86.98  |
|            | 15  | 13.92 | 13.52 | 16.99 | 92.79  | 90.15  | 113.24 | 10.95 | 10.28 | 13.43 | 73.00 | 68.52  | 89.54  | 9.24  | 12.75 | 13.95 | 61.61 | 84.97  | 92.98  |
| Tyrosine   | 2.5 | 2.37  | 2.78  | 2.77  | 94.80  | 111.09 | 110.90 | 1.73  | 2.38  | 2.14  | 69.38 | 95.26  | 85.60  | 2.24  | 2.57  | 2.56  | 89.78 | 102.84 | 102.38 |
|            | 7.5 | 7.03  | 7.70  | 8.29  | 93.70  | 102.70 | 110.51 | 6.07  | 5.70  | 7.30  | 80.89 | 75.98  | 97.34  | 6.39  | 7.30  | 7.76  | 85.21 | 97.27  | 103.51 |
|            | 15  | 13.61 | 13.68 | 17.36 | 90.73  | 91.19  | 115.75 | 10.70 | 12.33 | 12.66 | 71.32 | 82.17  | 84.40  | 11.53 | 14.06 | 16.22 | 76.89 | 93.74  | 108.10 |
| Putrescine | 2.5 | 2.61  | 2.50  | 2.20  | 104.24 | 100.06 | 88.13  | 1.56  | 2.45  | 1.88  | 62.52 | 97.82  | 75.23  | 1.88  | 2.20  | 1.84  | 75.04 | 87.81  | 73.63  |
|            | 7.5 | 8.04  | 7.35  | 7.30  | 107.21 | 98.05  | 97.32  | 6.97  | 5.62  | 6.76  | 92.87 | 74.97  | 90.17  | 5.60  | 6.05  | 5.51  | 74.61 | 80.64  | 73.46  |
|            | 15  | 15.23 | 13.96 | 15.61 | 101.56 | 93.08  | 104.09 | 11.69 | 13.30 | 11.62 | 77.96 | 88.67  | 77.46  | 9.34  | 12.52 | 11.93 | 62.24 | 83.48  | 79.51  |
| Methionine | 2.5 | 2.37  | 2.62  | 2.37  | 94.93  | 104.58 | 94.66  | 1.74  | 2.49  | 1.98  | 69.45 | 99.73  | 79.15  | 2.10  | 2.40  | 2.09  | 84.17 | 95.80  | 83.60  |
|            | 7.5 | 7.03  | 7.45  | 7.62  | 93.77  | 99.30  | 101.63 | 6.55  | 5.92  | 7.42  | 87.33 | 78.91  | 98.94  | 6.12  | 6.82  | 6.94  | 81.66 | 90.95  | 92.55  |
|            | 15  | 13.52 | 13.48 | 16.31 | 90.15  | 89.87  | 108.75 | 11.23 | 13.29 | 12.90 | 74.88 | 88.57  | 85.98  | 10.54 | 13.32 | 14.71 | 70.26 | 88.83  | 98.07  |
| Serotonin  | 2.5 | 2.28  | 2.94  | 2.20  | 91.29  | 117.66 | 88.06  | 2.00  | 2.87  | 1.95  | 79.95 | 114.70 | 78.07  | 2.34  | 2.80  | 2.14  | 93.57 | 111.94 | 85.65  |
|            | 7.5 | 6.27  | 7.53  | 7.00  | 83.57  | 100.38 | 93.36  | 6.27  | 6.34  | 7.03  | 83.64 | 84.52  | 93.71  | 6.09  | 7.24  | 6.85  | 81.16 | 96.52  | 91.39  |

|                                   |     |       |       |       |        |        |        |       |       |       |       |        |       |       |       |       |       |        |        |
|-----------------------------------|-----|-------|-------|-------|--------|--------|--------|-------|-------|-------|-------|--------|-------|-------|-------|-------|-------|--------|--------|
|                                   | 15  | 12.62 | 13.05 | 15.63 | 84.11  | 86.99  | 104.20 | 10.94 | 13.28 | 12.42 | 72.94 | 88.56  | 82.80 | 11.13 | 13.76 | 14.89 | 74.16 | 91.73  | 99.27  |
| Valine                            | 2.5 | 2.34  | 2.55  | 3.49  | 93.65  | 101.92 | 139.75 | 1.03  | 1.47  | 1.79  | 41.30 | 58.88  | 71.77 | 2.04  | 2.38  | 3.26  | 81.42 | 95.34  | 130.49 |
|                                   | 7.5 | 7.05  | 7.43  | 10.74 | 93.97  | 99.08  | 143.23 | 4.04  | 3.41  | 6.16  | 53.88 | 45.48  | 82.10 | 6.03  | 6.86  | 9.84  | 80.38 | 91.51  | 131.14 |
|                                   | 15  | 13.46 | 13.74 | 22.69 | 89.73  | 91.61  | 151.25 | 6.92  | 7.71  | 10.57 | 46.11 | 51.41  | 70.45 | 10.17 | 13.70 | 20.54 | 67.80 | 91.32  | 136.93 |
| Cadaverine                        | 2.5 | 2.61  | 2.45  | 2.65  | 104.22 | 97.92  | 106.12 | 1.16  | 1.91  | 1.81  | 46.47 | 76.47  | 72.27 | 1.86  | 2.23  | 2.34  | 74.25 | 89.13  | 93.63  |
|                                   | 7.5 | 7.76  | 7.08  | 8.47  | 103.45 | 94.41  | 112.92 | 5.57  | 4.37  | 6.37  | 74.22 | 58.20  | 84.99 | 5.51  | 6.03  | 6.67  | 73.42 | 80.35  | 88.88  |
|                                   | 15  | 14.37 | 13.67 | 17.92 | 95.80  | 91.12  | 119.48 | 9.32  | 10.58 | 11.28 | 62.12 | 70.54  | 75.20 | 9.34  | 12.72 | 14.46 | 62.24 | 84.78  | 96.42  |
| Tyramine                          | 2.5 | 2.49  | 2.85  | 2.48  | 99.51  | 113.96 | 99.24  | 2.04  | 2.80  | 2.23  | 81.53 | 111.94 | 89.27 | 2.32  | 2.57  | 2.30  | 92.83 | 102.92 | 91.88  |
|                                   | 7.5 | 7.29  | 7.82  | 7.17  | 97.21  | 104.31 | 95.53  | 7.38  | 6.84  | 7.42  | 98.45 | 91.13  | 98.96 | 6.42  | 7.19  | 6.55  | 85.60 | 95.92  | 87.32  |
|                                   | 15  | 14.08 | 13.95 | 14.86 | 93.87  | 92.97  | 99.09  | 12.89 | 15.06 | 12.81 | 85.96 | 100.39 | 85.41 | 11.57 | 14.05 | 13.70 | 77.13 | 93.64  | 91.31  |
| Isoleucine                        | 2.5 | 2.45  | 2.56  | 2.52  | 98.00  | 102.22 | 100.61 | 1.74  | 2.54  | 2.23  | 69.65 | 101.55 | 89.12 | 2.06  | 2.33  | 2.28  | 82.56 | 93.15  | 91.07  |
|                                   | 7.5 | 7.32  | 7.33  | 7.23  | 97.64  | 97.71  | 96.43  | 6.93  | 6.05  | 7.24  | 92.45 | 80.69  | 96.58 | 6.03  | 6.57  | 6.38  | 80.44 | 87.59  | 85.07  |
|                                   | 15  | 13.99 | 13.54 | 15.04 | 93.25  | 90.23  | 100.27 | 11.81 | 13.87 | 12.39 | 78.73 | 92.49  | 82.61 | 10.24 | 13.14 | 13.12 | 68.28 | 87.58  | 87.46  |
| Leucine                           | 2.5 | 2.74  | 2.30  | 2.44  | 109.63 | 92.15  | 97.59  | 1.73  | 1.84  | 1.57  | 69.14 | 73.68  | 62.92 | 2.15  | 2.06  | 2.20  | 86.07 | 82.47  | 87.96  |
|                                   | 7.5 | 7.84  | 7.35  | 7.64  | 104.48 | 98.00  | 101.91 | 5.87  | 5.44  | 4.94  | 78.24 | 72.55  | 65.92 | 6.11  | 6.45  | 6.52  | 81.46 | 86.05  | 86.99  |
|                                   | 15  | 14.14 | 13.89 | 15.46 | 94.26  | 92.58  | 103.09 | 10.76 | 13.93 | 9.66  | 71.74 | 92.84  | 64.43 | 10.18 | 13.34 | 13.66 | 67.83 | 88.92  | 91.07  |
| Phenylalanine                     | 2.5 | 2.28  | 2.72  | 2.42  | 91.23  | 108.90 | 96.71  | 1.83  | 2.59  | 2.11  | 73.38 | 103.51 | 84.45 | 2.20  | 2.51  | 2.28  | 87.99 | 100.20 | 91.25  |
|                                   | 7.5 | 6.80  | 7.50  | 7.28  | 90.71  | 100.04 | 97.12  | 6.66  | 6.27  | 7.32  | 88.85 | 83.62  | 97.55 | 6.26  | 7.07  | 6.91  | 83.49 | 94.23  | 92.16  |
|                                   | 15  | 13.20 | 13.36 | 15.30 | 87.97  | 89.03  | 102.01 | 11.70 | 13.84 | 12.78 | 78.02 | 92.25  | 85.20 | 11.28 | 13.70 | 14.51 | 75.21 | 91.33  | 96.70  |
| Tryptophan                        | 2.5 | 2.42  | 2.80  | 2.22  | 96.85  | 112.12 | 88.91  | 2.07  | 2.73  | 1.92  | 82.70 | 109.19 | 76.69 | 2.25  | 2.63  | 2.10  | 90.16 | 105.24 | 84.00  |
|                                   | 7.5 | 6.62  | 7.30  | 6.80  | 88.27  | 97.40  | 90.64  | 6.43  | 6.37  | 6.81  | 85.67 | 84.88  | 90.81 | 6.12  | 6.99  | 6.51  | 81.65 | 93.17  | 86.79  |
|                                   | 15  | 12.55 | 12.80 | 14.31 | 83.67  | 85.31  | 95.39  | 11.21 | 13.44 | 12.04 | 74.75 | 89.57  | 80.24 | 11.13 | 13.36 | 13.89 | 74.20 | 89.09  | 92.60  |
| Tryptamine +<br>2-phenethyl-amine | 2.5 | 2.19  | 2.55  | 2.00  | 87.76  | 101.83 | 79.85  | 1.78  | 2.47  | 1.71  | 71.14 | 98.71  | 68.46 | 2.04  | 2.32  | 1.84  | 81.43 | 92.94  | 73.49  |
|                                   | 7.5 | 6.24  | 6.83  | 6.39  | 83.21  | 91.10  | 85.26  | 6.12  | 5.83  | 6.44  | 81.62 | 77.76  | 85.81 | 5.57  | 6.37  | 5.88  | 74.21 | 84.88  | 78.45  |
|                                   | 15  | 13.94 | 13.96 | 13.59 | 92.90  | 93.04  | 90.60  | 10.60 | 12.62 | 11.32 | 70.67 | 84.13  | 75.45 | 11.74 | 14.32 | 12.72 | 78.24 | 95.47  | 84.82  |
