# Supplementary figures and images for: Fast and Sensitive Quantification of AccQ-Tag Derivatized Amino Acids and Biogenic Amines by UHPLC-UV Analysis from Complex Biological Samples
Source: MDPI journal article supplement (doi:10.3390/metabo12030272), 2022-03-21

SUPPLEMENTARY FIGURE S1

**Ala**

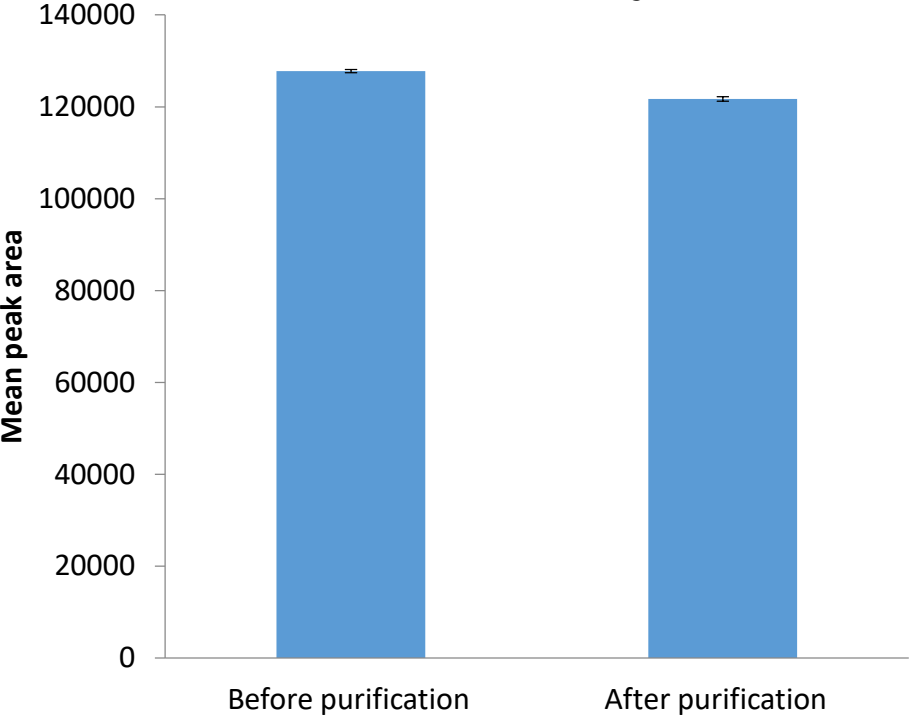

**Arg**

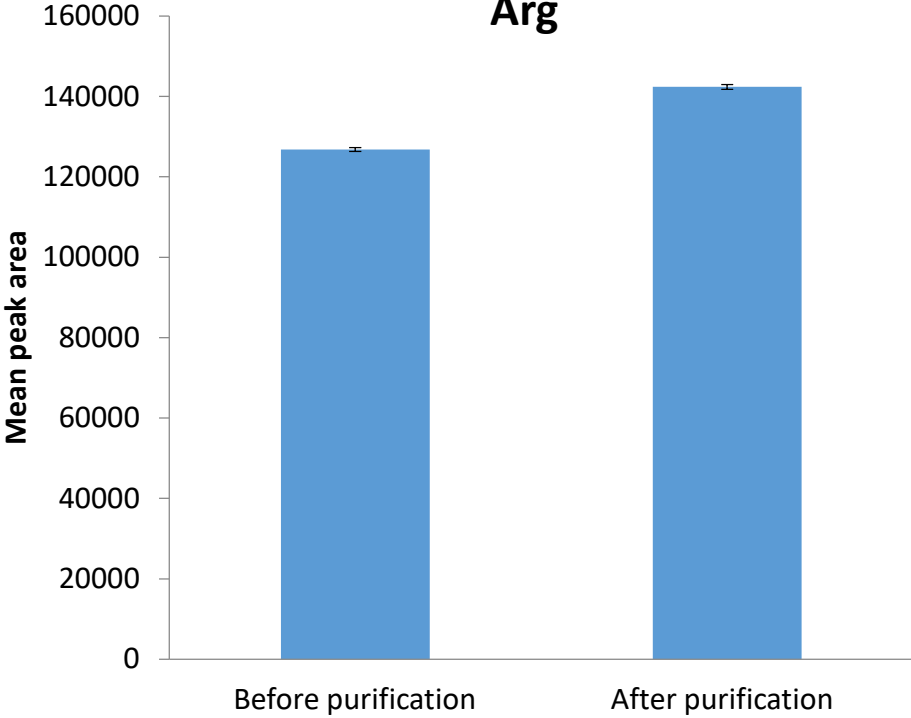

**Asn**

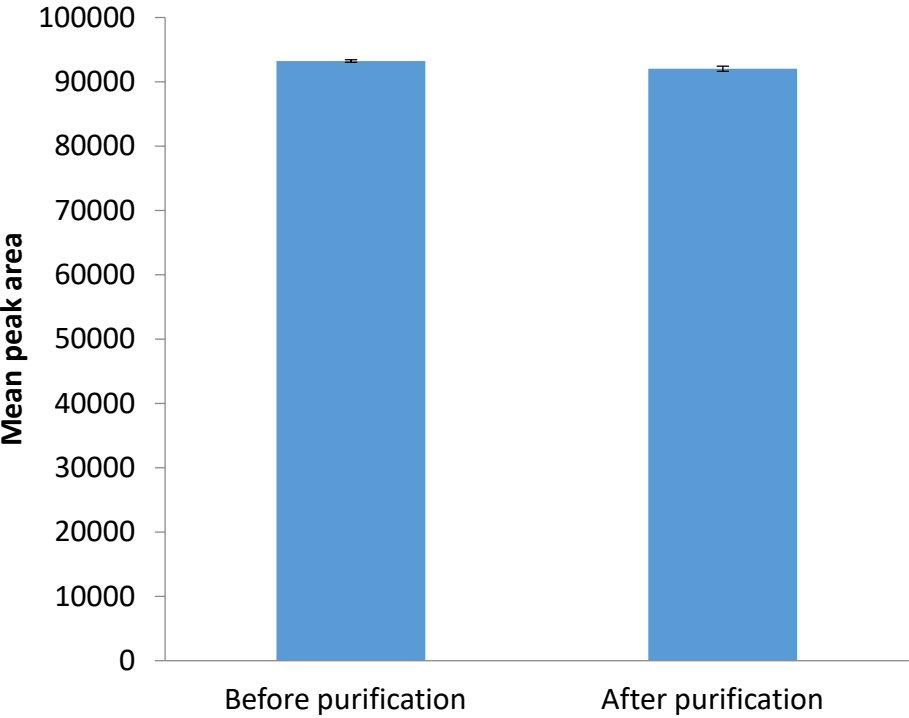

**Asp**

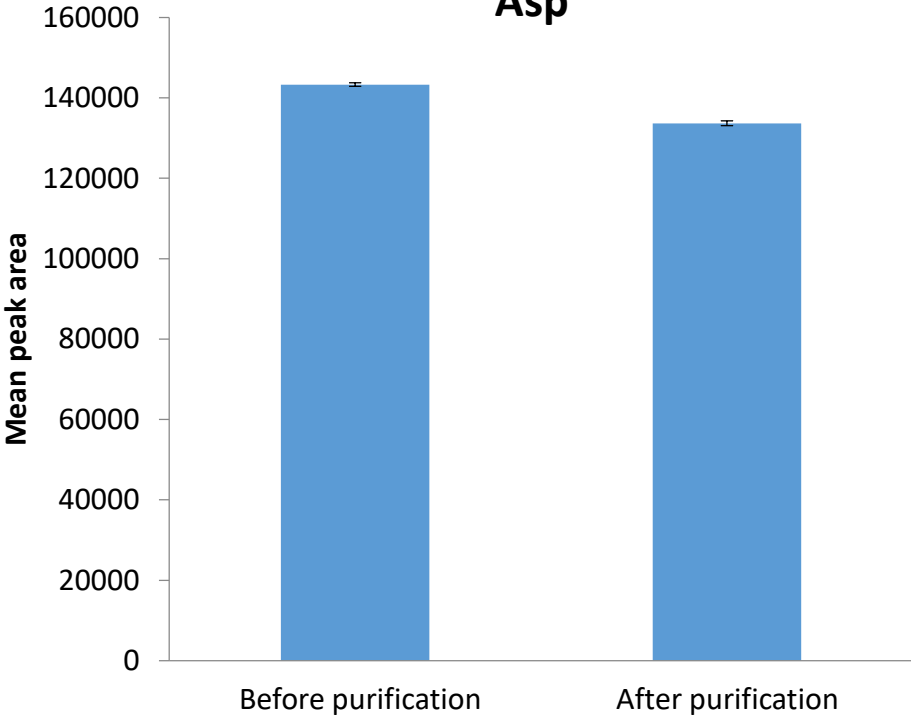

**Cys**

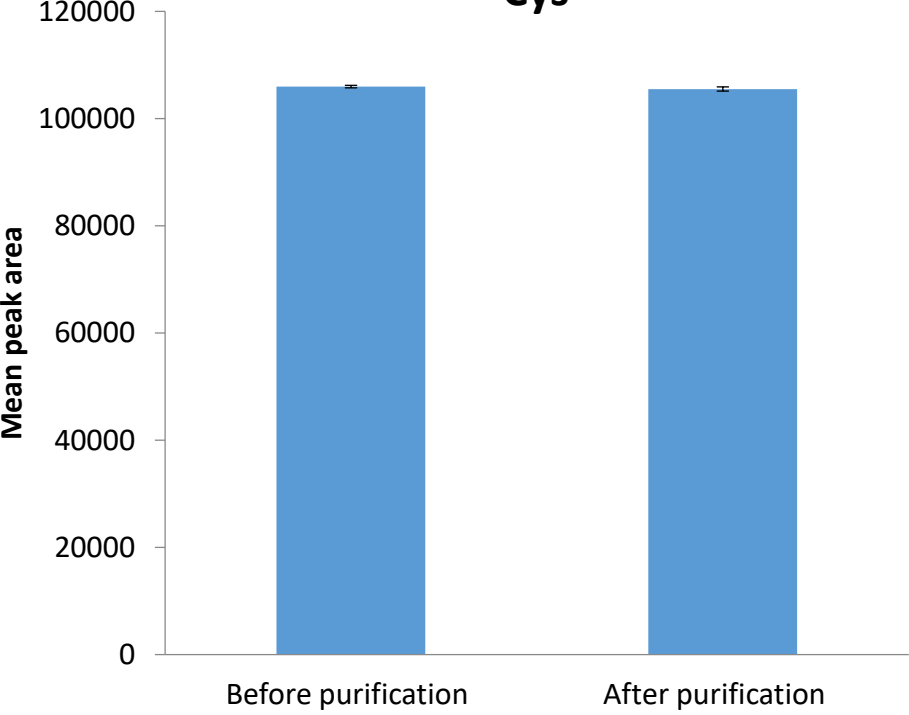

**Gln**

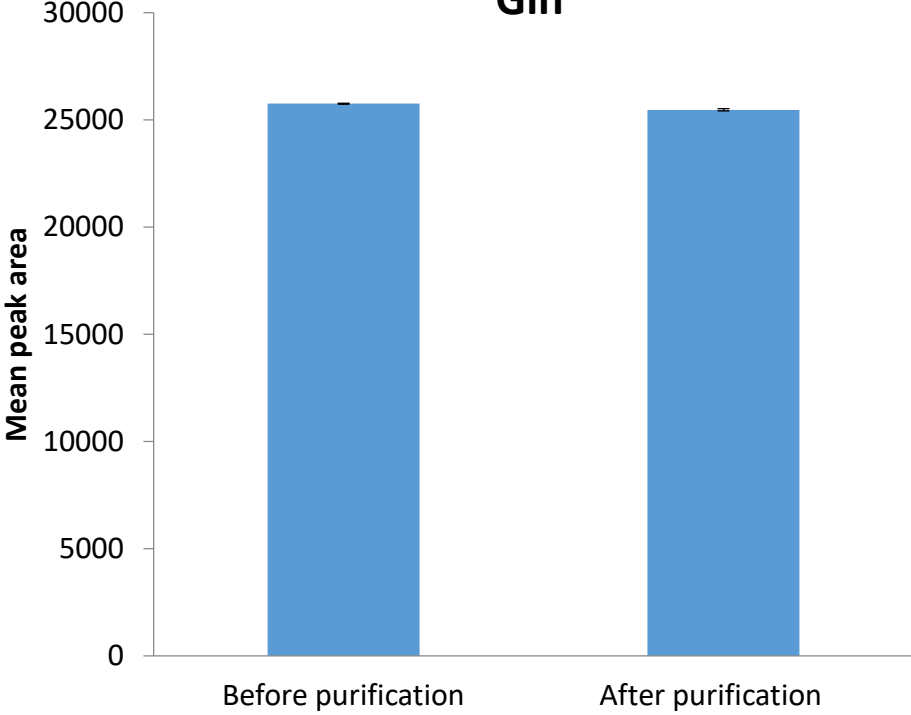

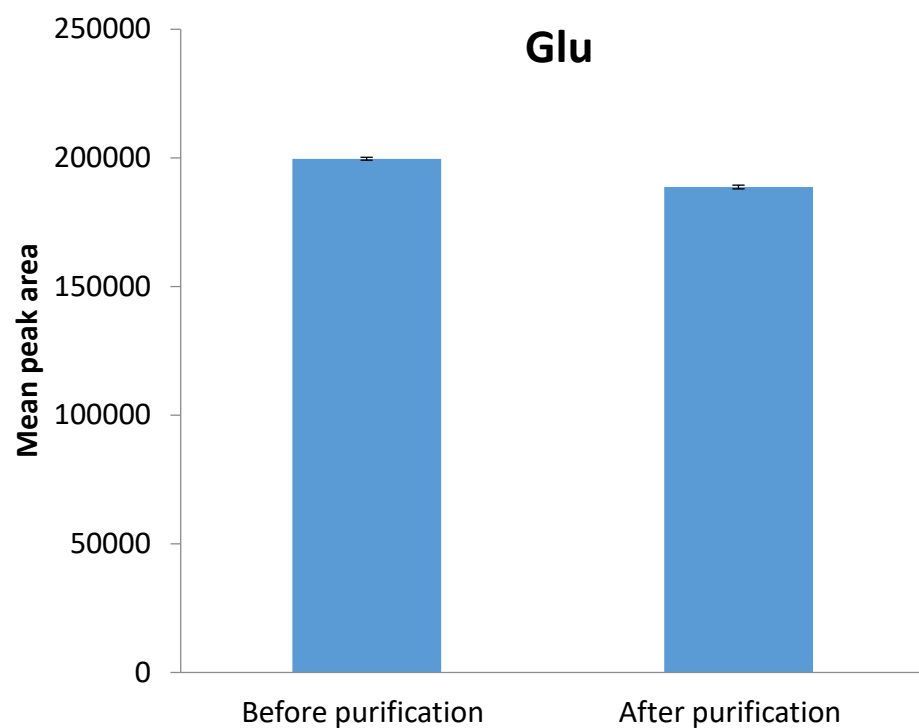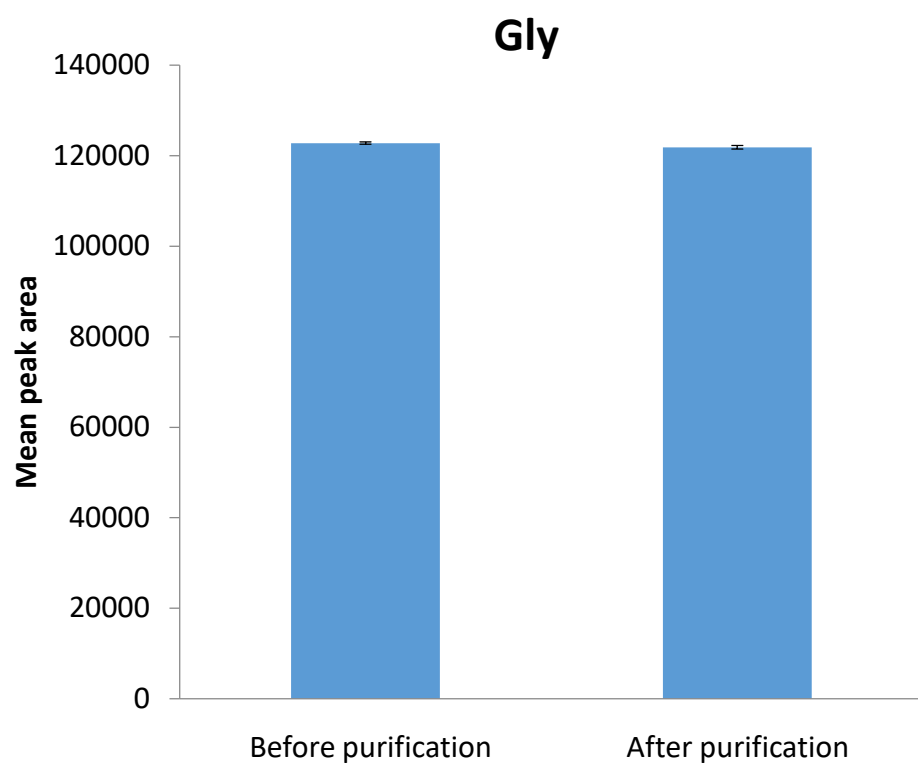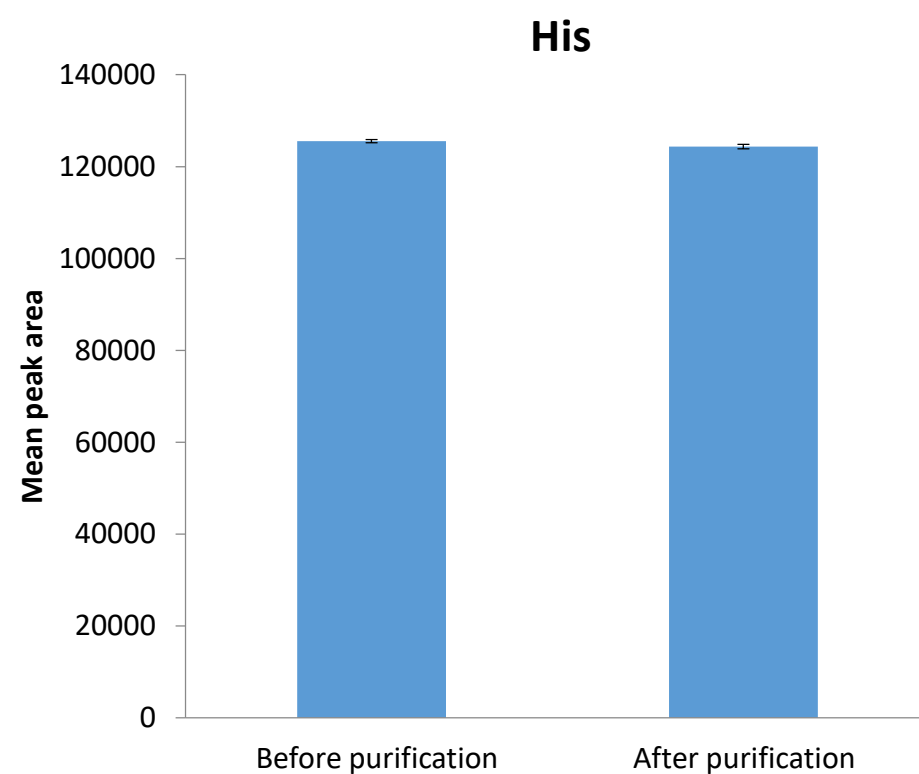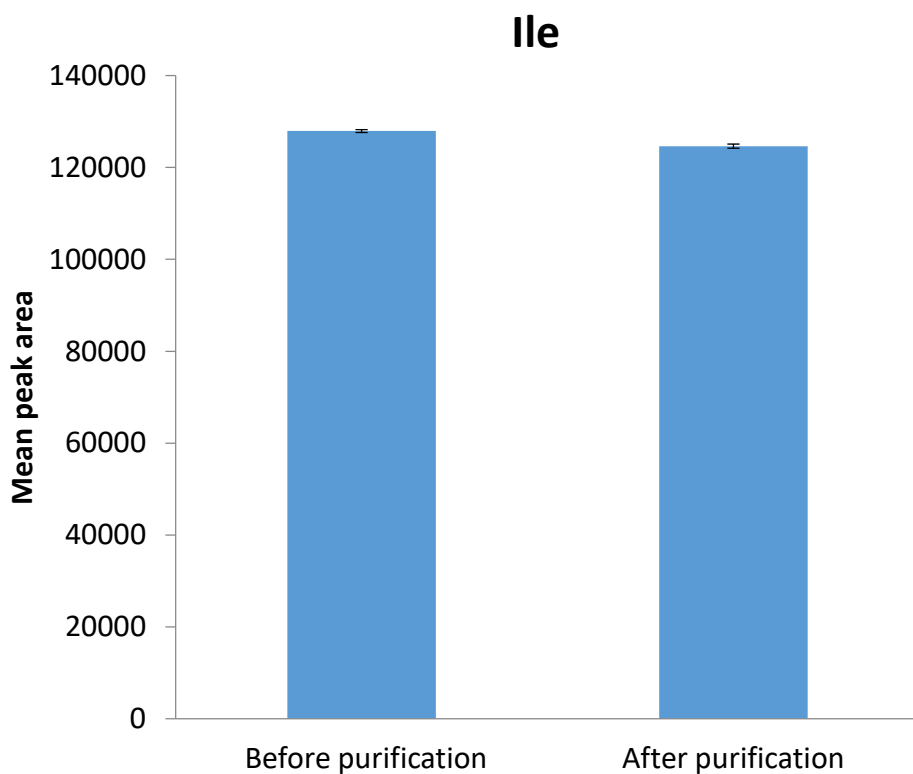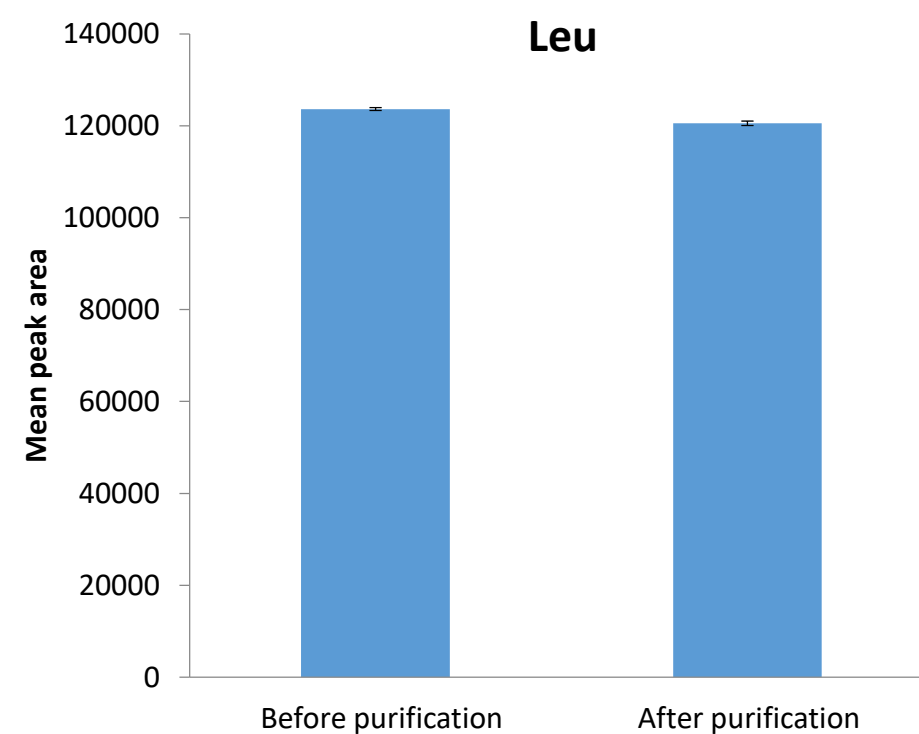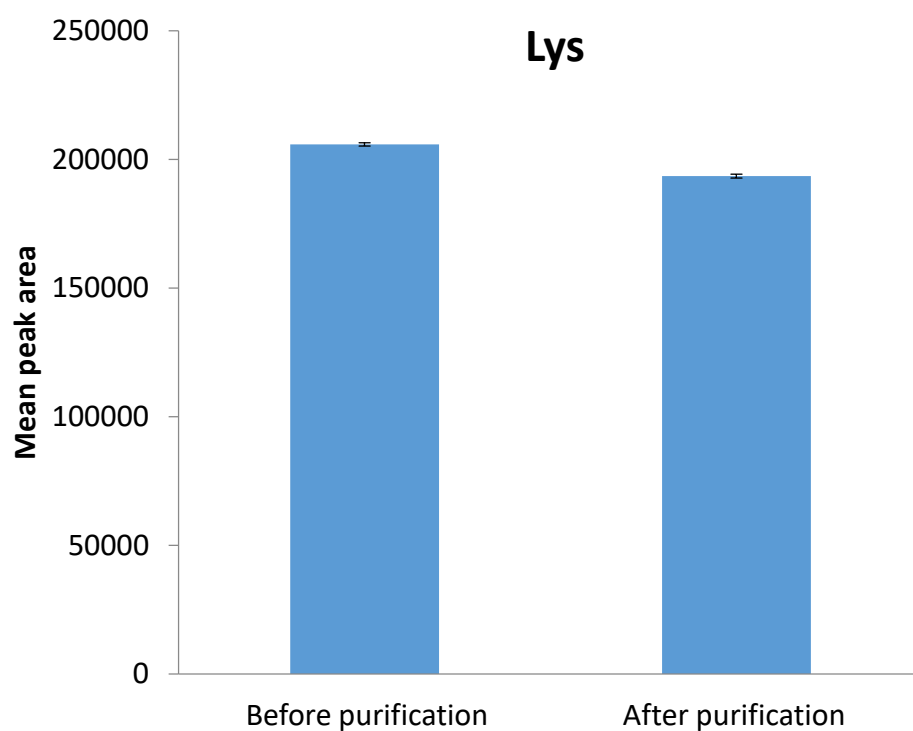

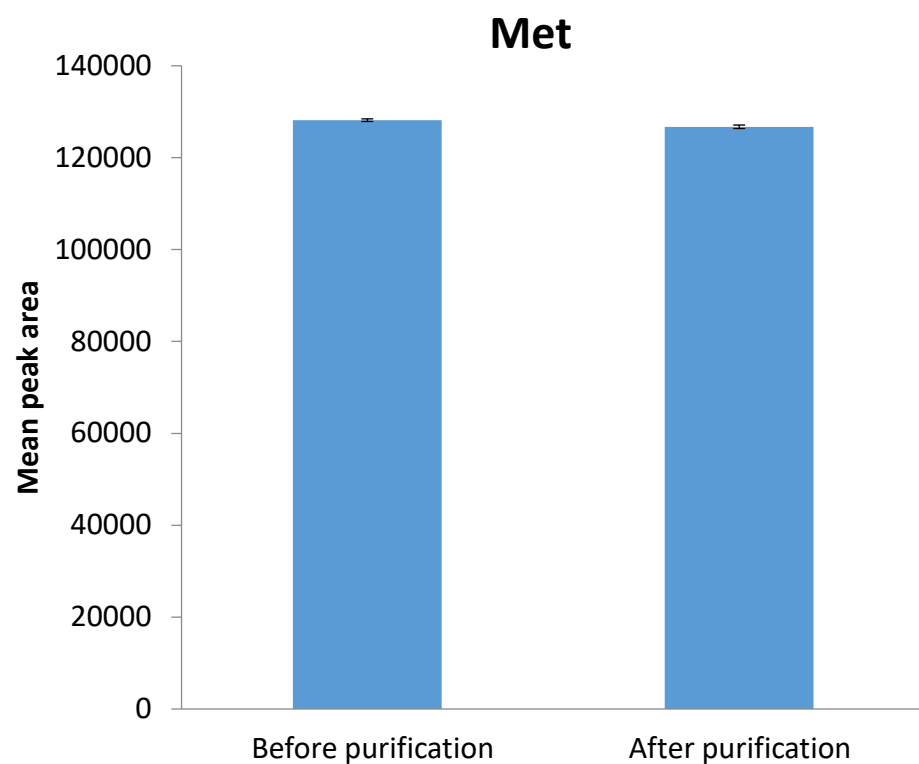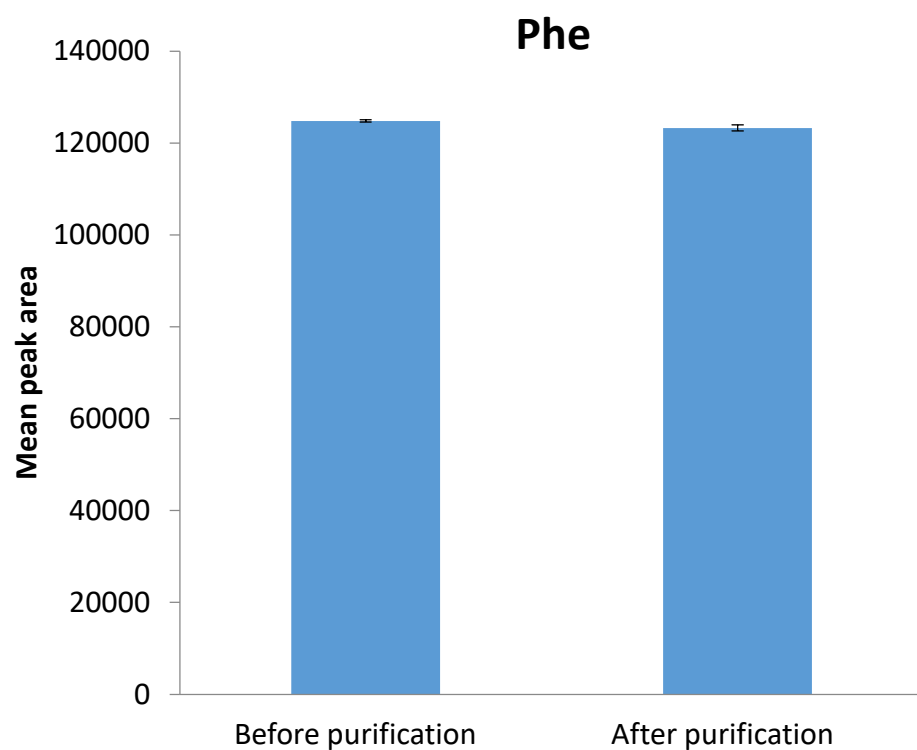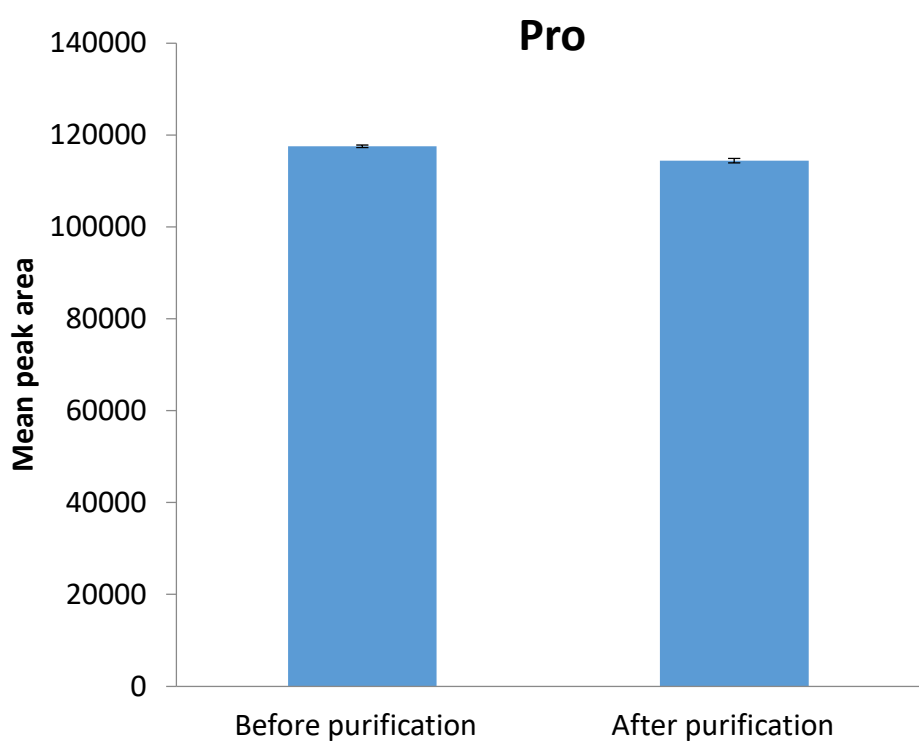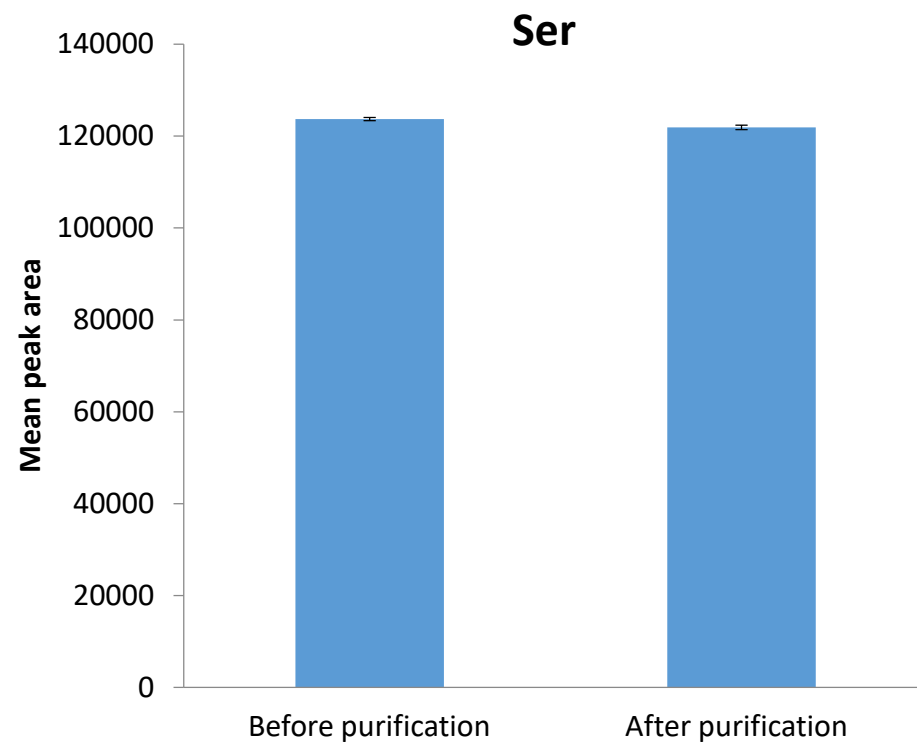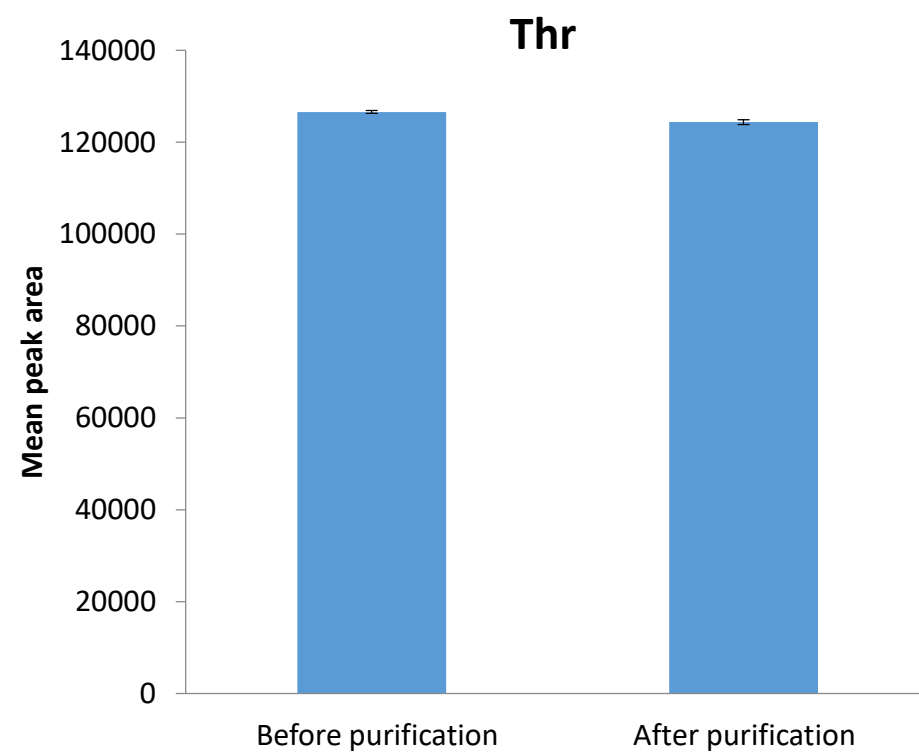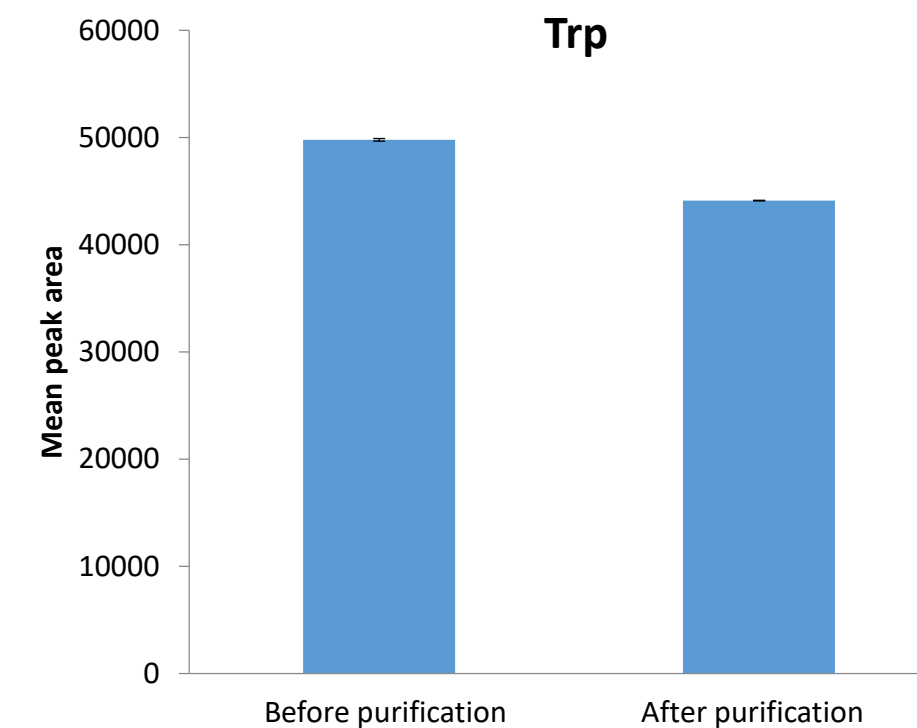

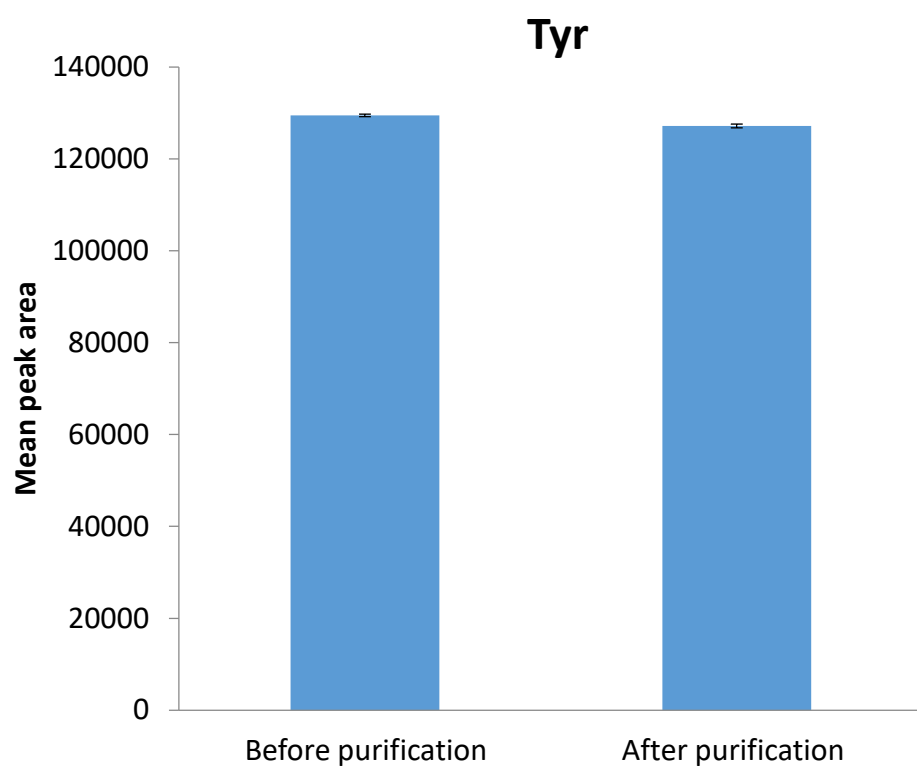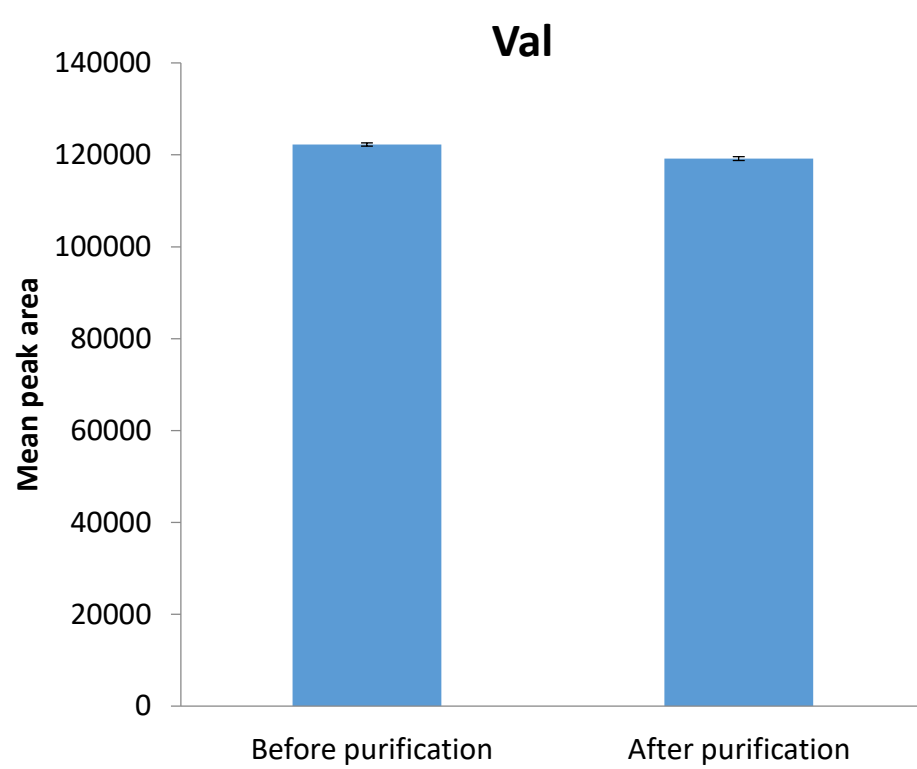

Supplement: s1 [file s1]
